# Supplementary material for: Direct hydroxylation of benzene and aromatics with H2O2catalyzed by a self-assembled iron complex: evidence for a metal-based mechanism
Source: Royal Society of Chemistry journal article supplement (doi:10.1039/c7cy01895a), 2017-01-01
Supplement: c7cy01895a1.pdf [file c7cy01895a1.pdf]

## Electronic Supplementary Information for

### **Direct Hydroxylation of Benzene and Aromatics with H<sub>2</sub>O<sub>2</sub> Catalyzed by a Self-Assembled Iron Complex: Evidence for a Metal-based Mechanism**

Giorgio Capocasa,<sup>a</sup> Giorgio Olivo,<sup>a,b</sup> Alessia Barbieri,<sup>a</sup> Osvaldo Lanzalunga<sup>a</sup> and Stefano Di Stefano<sup>a,\*</sup>

<sup>a</sup> *Dipartimento di Chimica, Università degli Studi di Roma “La Sapienza” and Istituto CNR di Metodologie Chimiche (IMC-CNR), Sezione Meccanismi di Reazione, c/o Dipartimento di Chimica, Università degli Studi di Roma “La Sapienza”, P.le A. Moro 5, I-00185 Rome, Italy.*

*E-mail: stefano.distefano@uniroma1.it*

<sup>b</sup> *Current address: Institut de Química Computacional i Catàlisi (IQCC) and Departament de Química, Universitat de Girona, Campus de Montilivi, 17071 Girona, Spain.*

## Table of Contents

|                                                                                                              |     |
|--------------------------------------------------------------------------------------------------------------|-----|
| Instruments and general methods.....                                                                         | S3  |
| Materials .....                                                                                              | S3  |
| Selected examples of <b>1</b> catalyzed H <sub>2</sub> O <sub>2</sub> oxidation of aromatic compounds .....  | S4  |
| Benzene (optimized conditions, one of the runs for entry 15 of Table 1).....                                 | S4  |
| Toluene (one of the runs of toluene oxidation reported in Table 2) .....                                     | S5  |
| Ethylbenzene (one of the runs of ethylbenzene oxidation reported in Table 2) .....                           | S6  |
| Cumene (one of the runs of cumene oxidation reported in Table 2).....                                        | S7  |
| <i>tert</i> -butylbenzene (one of the runs of <i>tert</i> -butylbenzene oxidation reported in Table 2) ..... | S8  |
| Chlorobenzene (one of the runs of chlorobenzene oxidation reported in Table 2).....                          | S9  |
| Bromobenzene (one of the runs of bromobenzene oxidation reported in Table 2).....                            | S9  |
| Benzonitrile (one of the runs of benzonitrile oxidation reported in Table 2) .....                           | S10 |
| Anisole (one of the runs of anisole oxidation reported in Table 2).....                                      | S10 |
| Competitive oxidation between X-substituted benzenes and cyclohexane .....                                   | S11 |
| Competitive oxidation between benzene and d <sub>6</sub> benzene (measure of KIE) .....                      | S12 |
| Oxidation of p-bromoanisole .....                                                                            | S13 |
| Oxidation in presence of a radical trap (bromotrichloromethane).....                                         | S15 |
| Rearrangement experiments.....                                                                               | S18 |
| Oxidation of <i>p</i> -xylene (one of the runs of <i>p</i> -xylene oxidation).....                           | S18 |
| Oxidation of <i>o</i> -xylene (one of the runs of <i>o</i> -xylene oxidation).....                           | S18 |
| Oxidation of phenyl benzoate .....                                                                           | S19 |
| Oxidation of cyclopropylbenzene .....                                                                        | S24 |

### *Instruments and general methods*

Oxidation products were identified by comparison of their GC retention times, GC/MS and  $^1\text{H}$  NMR spectra with those of authentic compounds. GC analyses were carried out on a gas chromatograph equipped with a capillary methylsilicone column (30 m x 0.25 mm x 25  $\mu\text{m}$ ) Chrompack CP-Sil 5 CB. GC-MS analyses were performed with a mass detector (EI at 70eV) coupled with a gas chromatograph equipped with a melted silica capillary column (30 m x 0.2 mm x 25  $\mu\text{m}$ ) covered with a methylsilicone film (5% phenylsilicone, OV5). NMR spectra were recorded on a BrukerDPX300 spectrometer and were internally referenced to the residual proton solvent signal.

### *Materials*

All reagents and solvents were purchased at the highest commercial quality and were used without further purification unless otherwise stated.  $\text{Fe}(\text{OTf})_2 \cdot 2\text{CH}_3\text{CN}$  (or  $\text{Fe}(\text{CF}_3\text{SO}_3)_2 \cdot 2\text{CH}_3\text{CN}$ ) was prepared according to a literature procedure<sup>1</sup> from Fe(II) chloride (Sigma Aldrich). Solvents were purchased from Sigma Aldrich and used as received.

1 A. Diebold, A. Elbouadili and K. S. Hagen, *Inorg. Chem.* 2000, **39**, 3915–3923.

*Selected examples of **1** catalyzed H<sub>2</sub>O<sub>2</sub> oxidation of aromatic compounds*

**Benzene (optimized conditions, one of the runs for entry 15 of Table 1)**

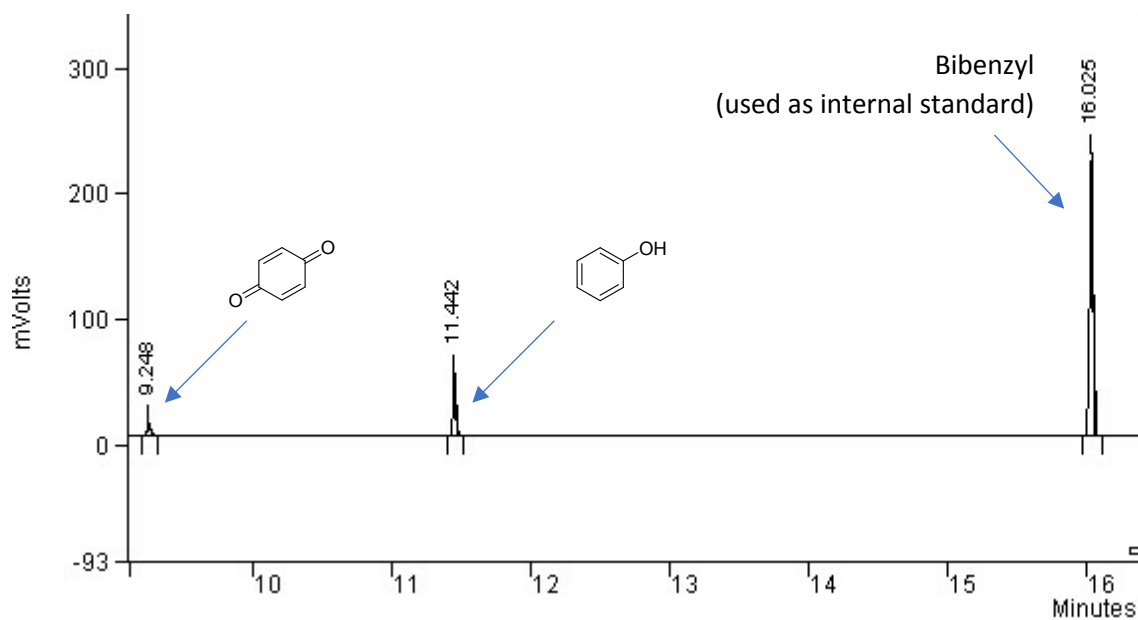

**Toluene (one of the runs of toluene oxidation reported in Table 2)**

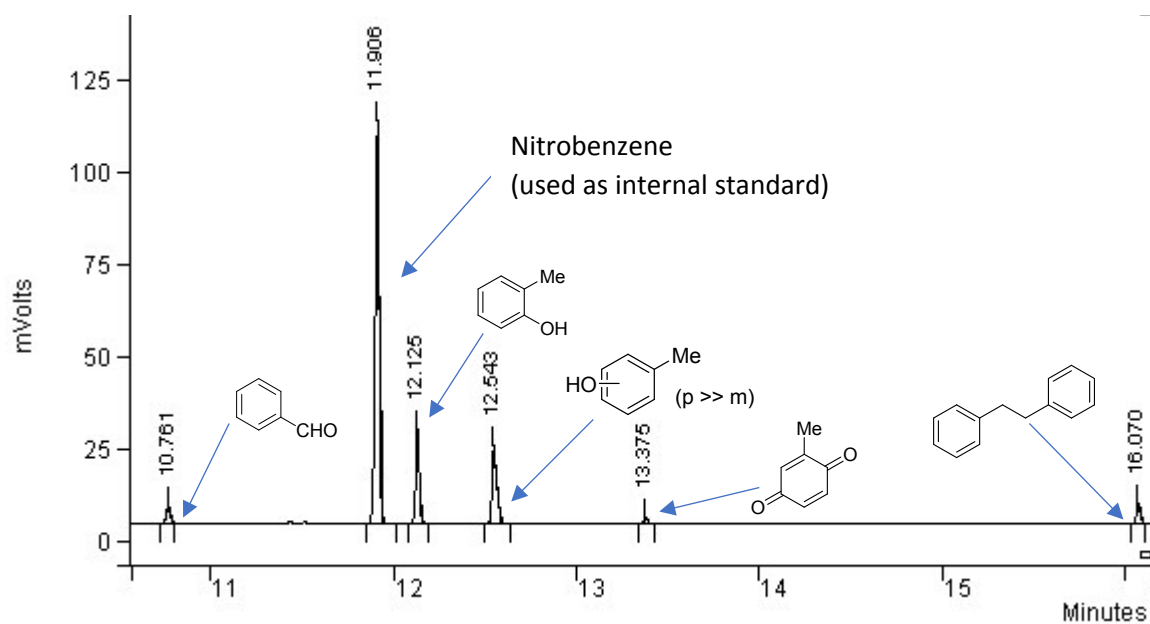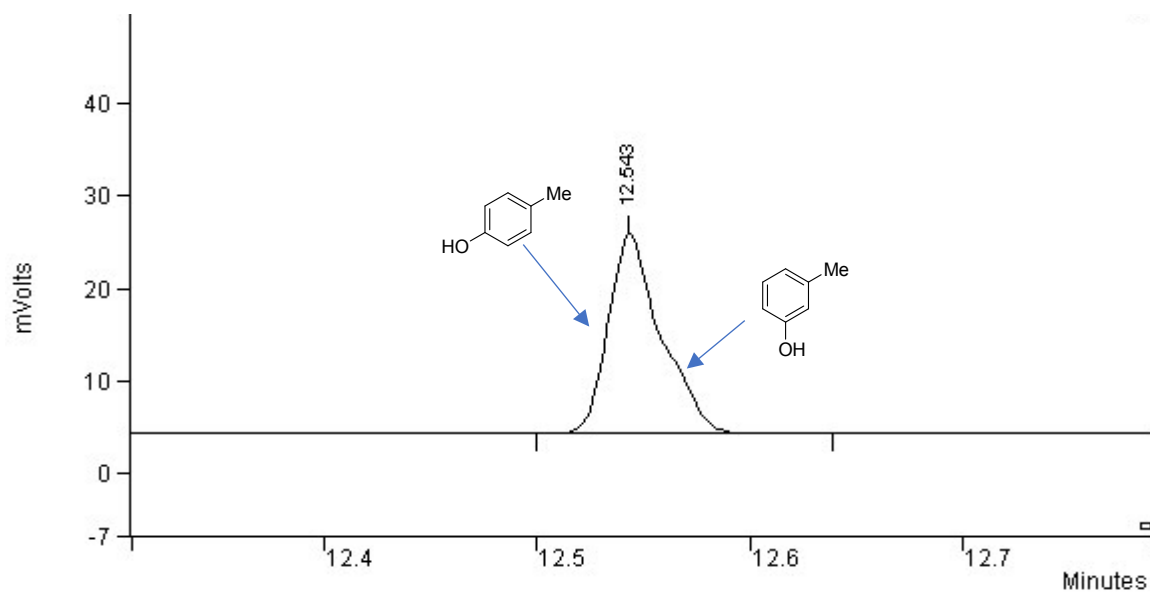

Toluene oxidation (zoom on the *p+m* cresols peak showing a 3:1 ratio).

# Ethylbenzene (one of the runs of ethylbenzene oxidation reported in Table 2)

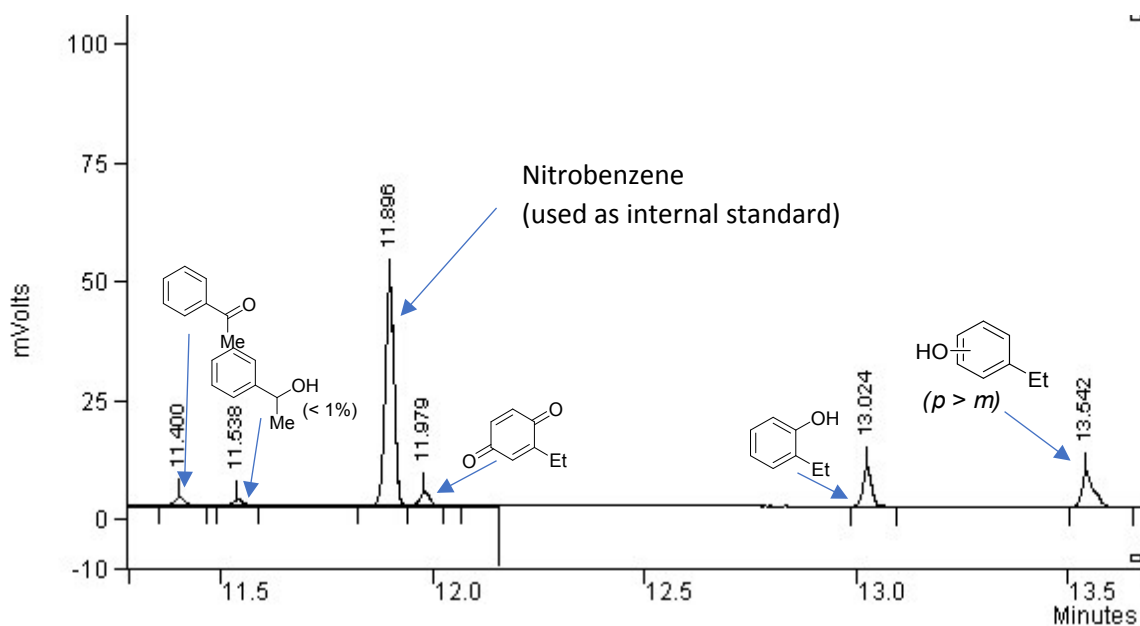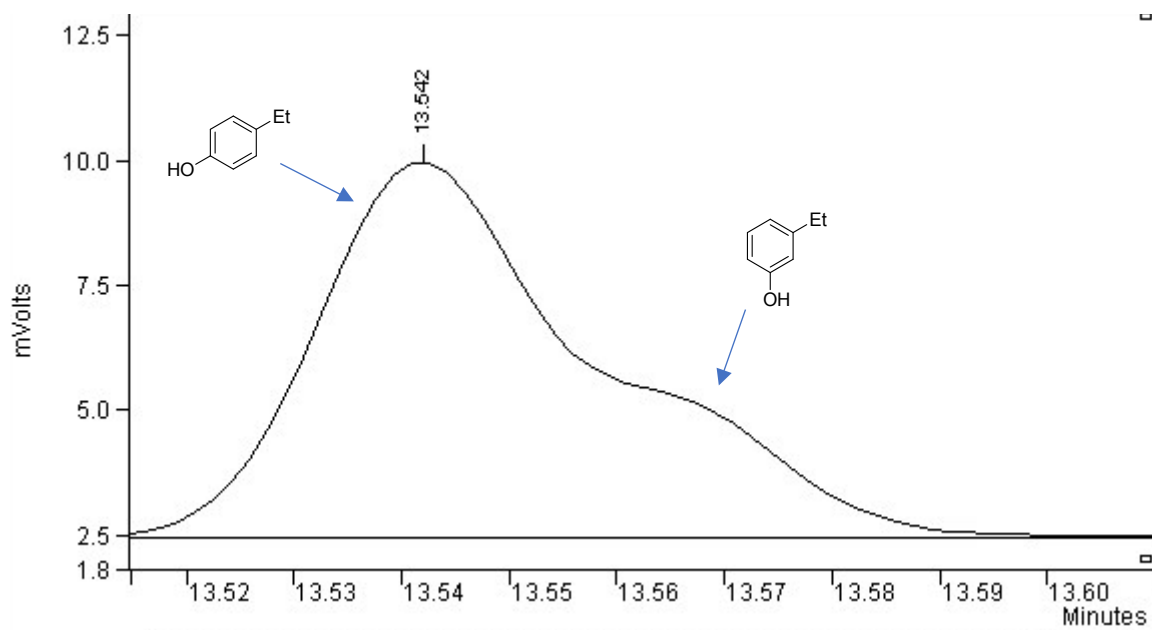

Ethylbenzene oxidation (zoom on the  $p+m$  ethylphenols peak showing a 2:1 ratio)

**Cumene (one of the runs of cumene oxidation reported in Table 2)**

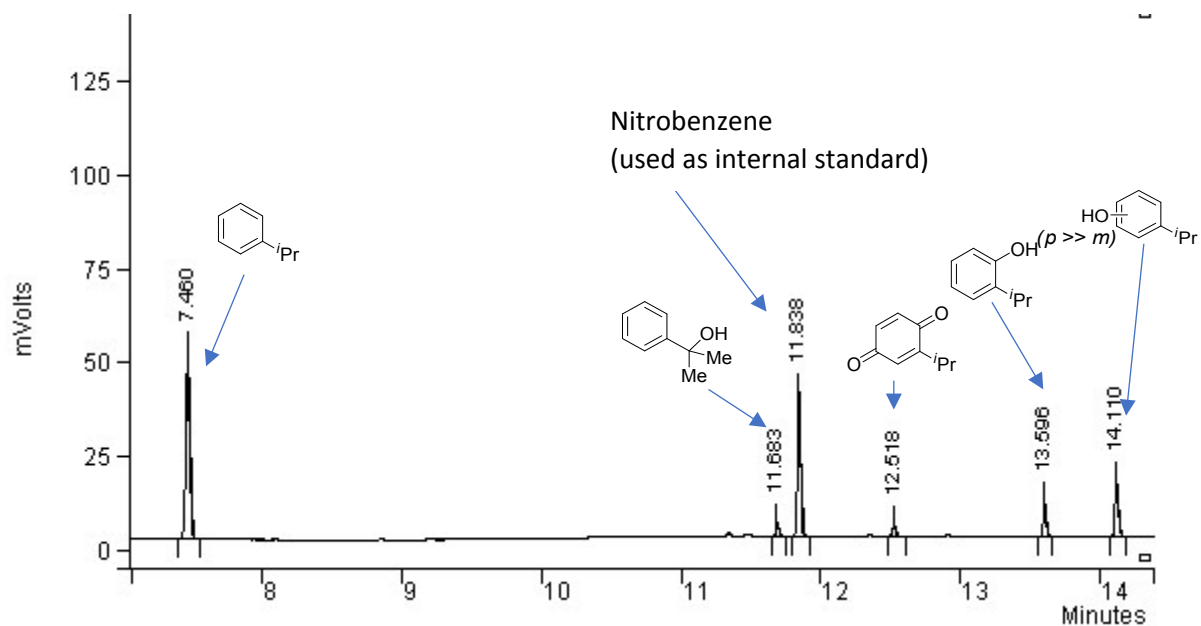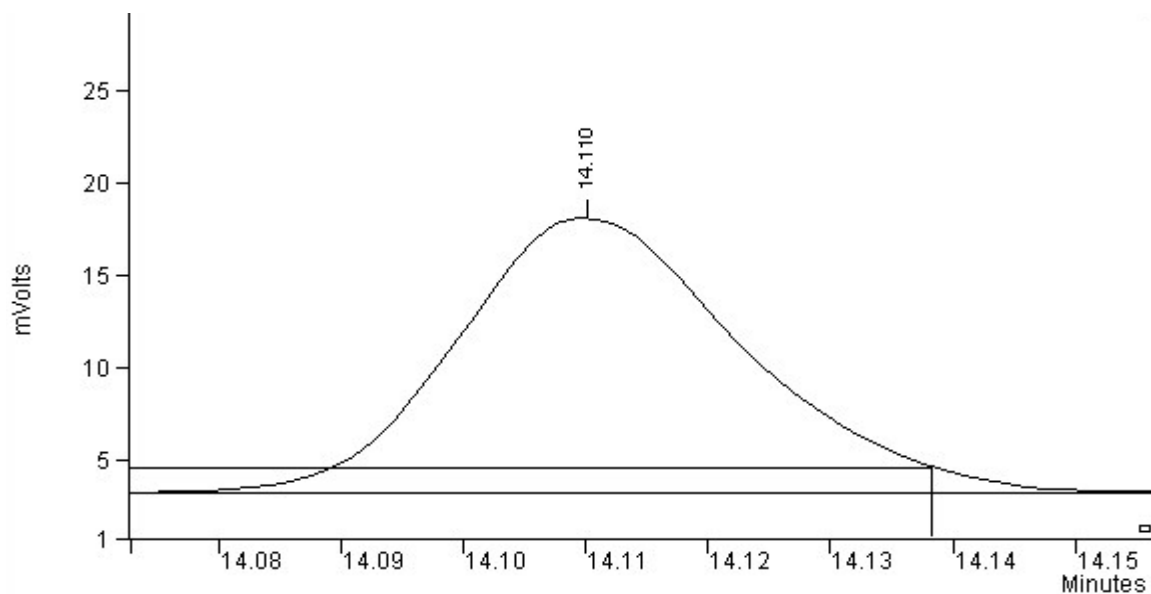

Cumene oxidation (zoom on the *p*-isopropylphenol peak showing a single maximum with no visible contribution from the *meta* isomer)

***tert*-butylbenzene (one of the runs of *tert*-butylbenzene oxidation reported in Table 2)**

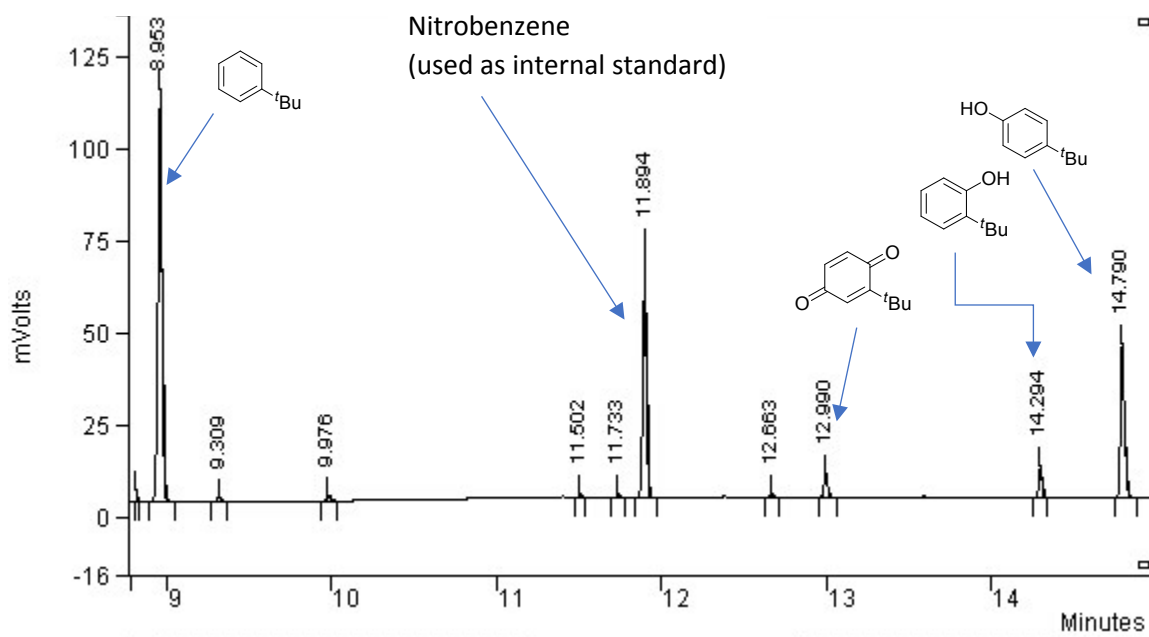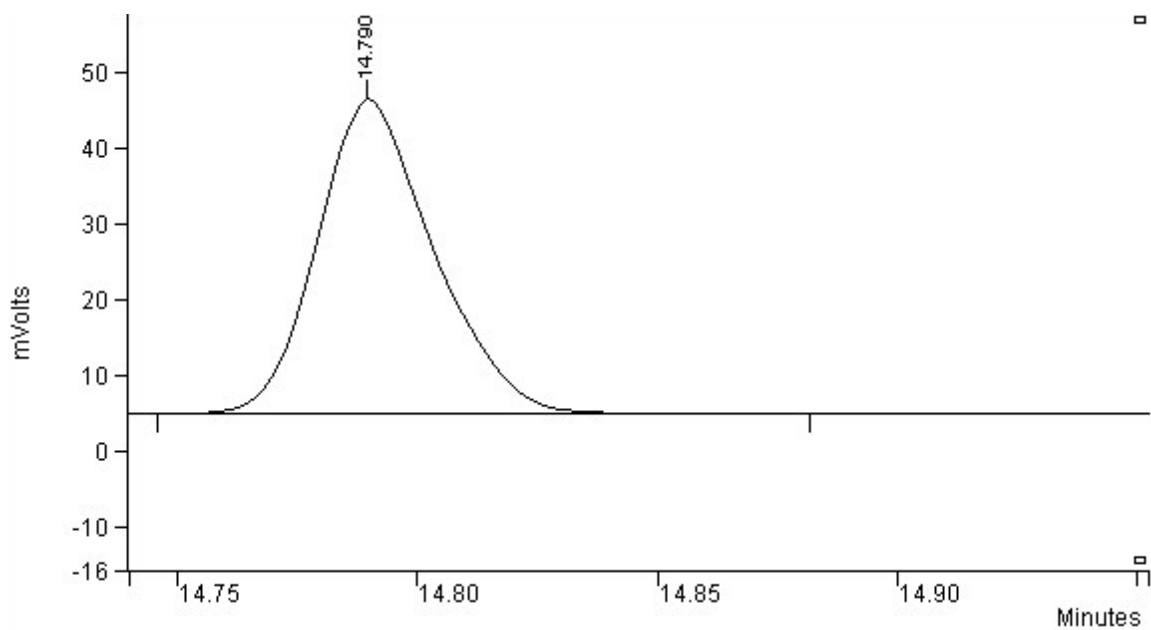

*tert*-butylbenzene oxidation (zoom on the *p*-*tert*-butylphenol peak showing a single maximum with no visible contribution from the meta isomer)



### Chlorobenzene (one of the runs of chlorobenzene oxidation reported in Table 2)

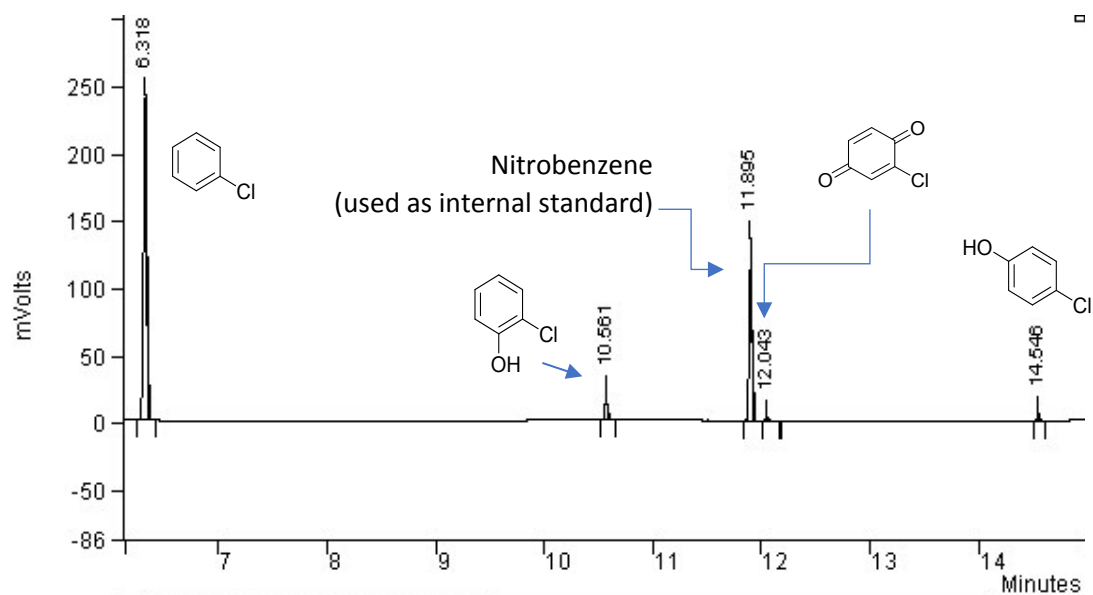

### Bromobenzene (one of the runs of bromobenzene oxidation reported in Table 2)

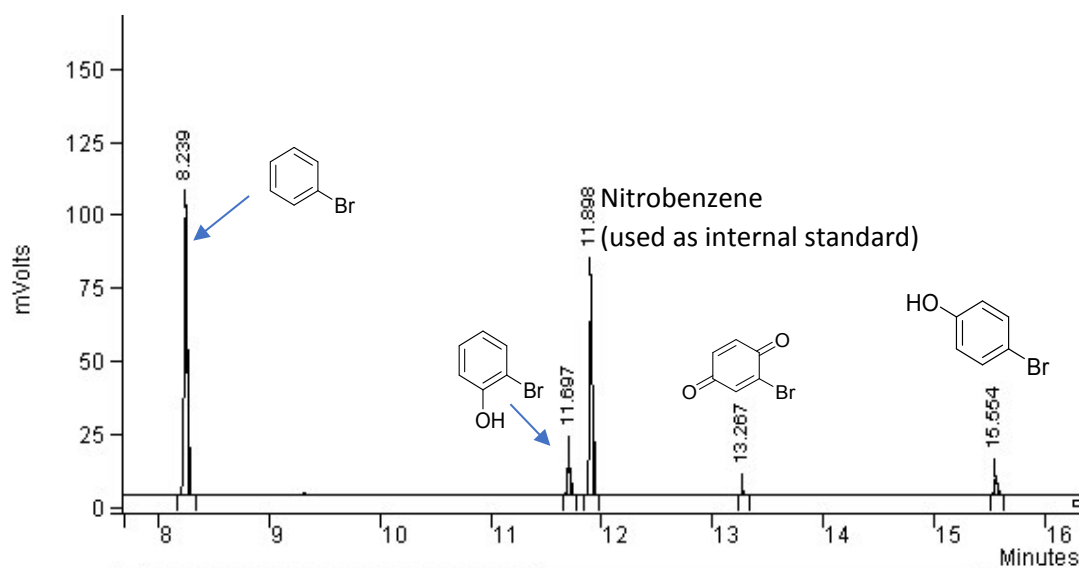

**Benzonitrile (one of the runs of benzonitrile oxidation reported in Table 2)**

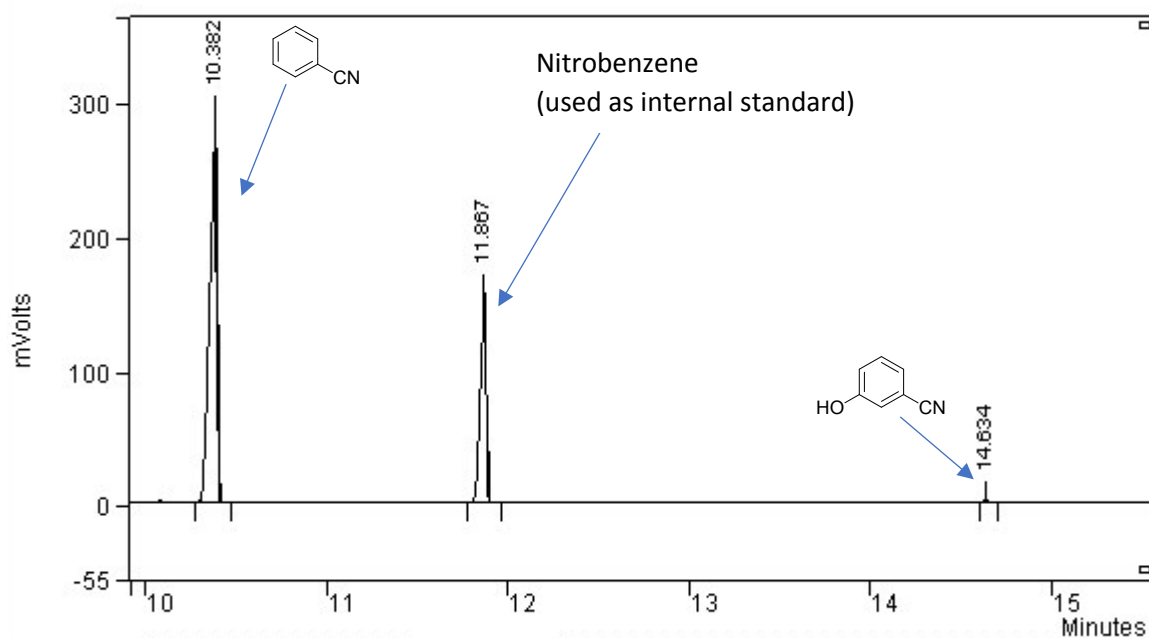

**Anisole (one of the runs of anisole oxidation reported in Table 2)**

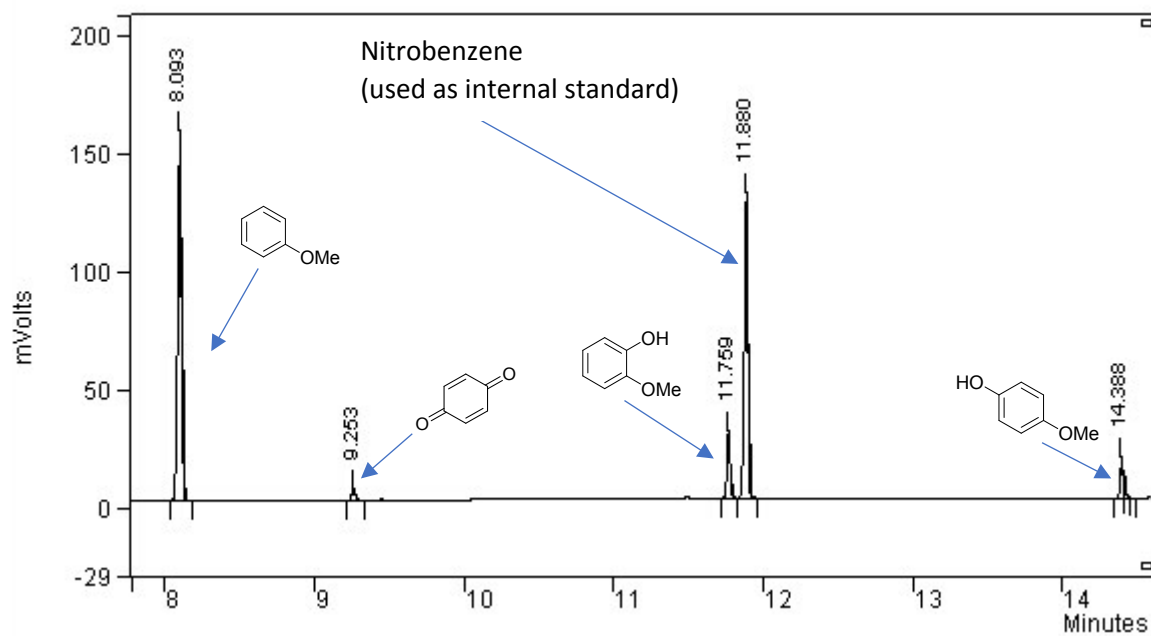

### *Competitive oxidation between X-substituted benzenes and cyclohexane*

The reaction was carried out with limiting amount of hydrogen peroxide and half of the arene (in moles) was replaced with cyclohexane. The final ratio is catalyst **1**:ArX: CyH: H<sub>2</sub>O<sub>2</sub> 1:50:50:100. The products were identified by comparison of their retention times with authentic samples and quantified by internal standard.

## Competitive oxidation between benzene and $d_6$ benzene (measure of KIE)

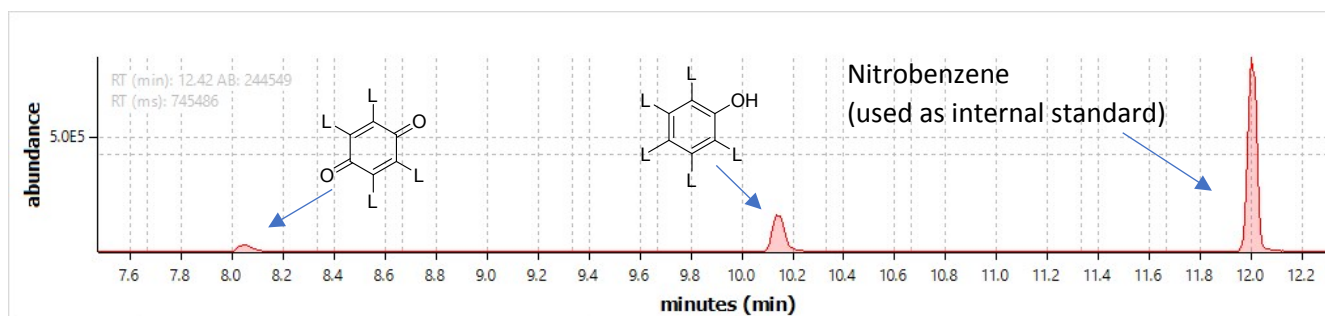

$d_6$ -benzene and benzene competitive oxidation (L = H or D)

For the run shown, mean abundances for ions with  $m/z = 94$  and  $99$  over the phenol peak (RT(min)=10.023-10.784) were respectively 5039 and 5122 which translates to a KIE of 0.98.

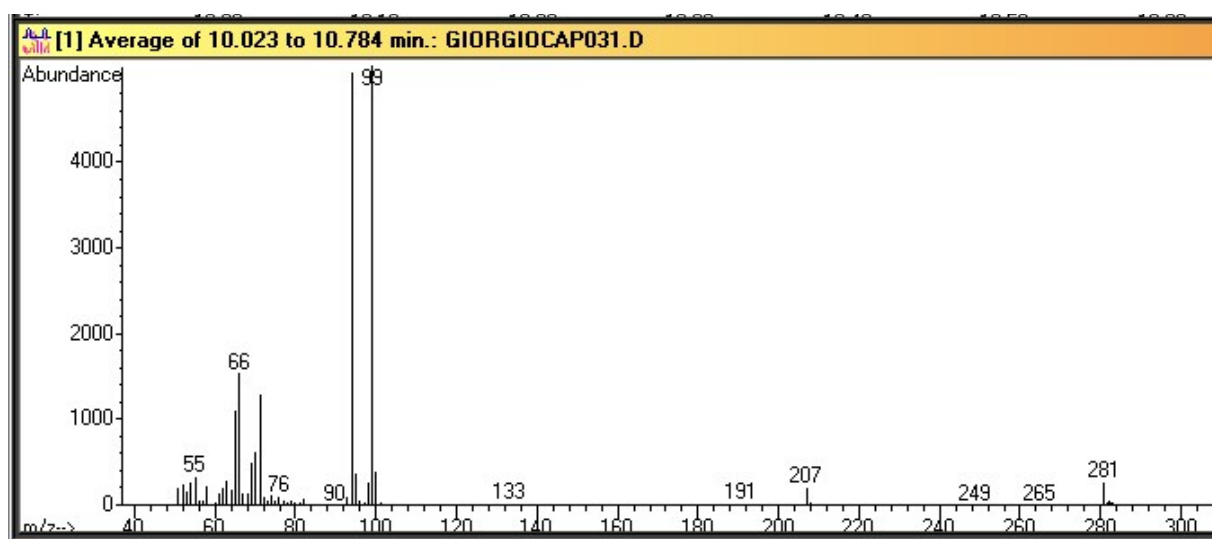

## Oxidation of *p*-bromoanisole

In order to evaluate the relative activation properties of bromo- and methoxy- substituents on the aromatic ring, we carried out the **1** catalyzed oxidation of *p*-bromoanisole with H<sub>2</sub>O<sub>2</sub>. The only detectable phenol product present in the crude mixture was found to be 5-bromo-2-methoxyphenol (identified by MS and <sup>1</sup>H-NMR).

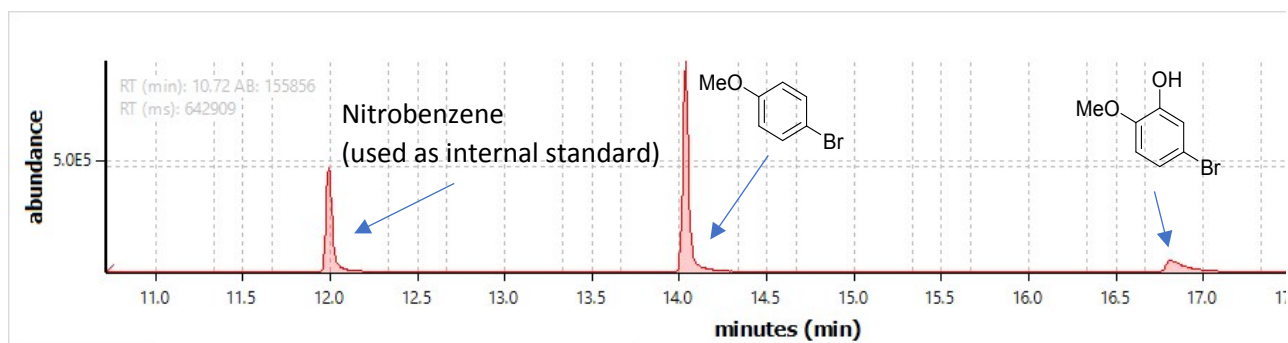

Chromatogram of crude mixture of *p*-bromoanisole oxidation

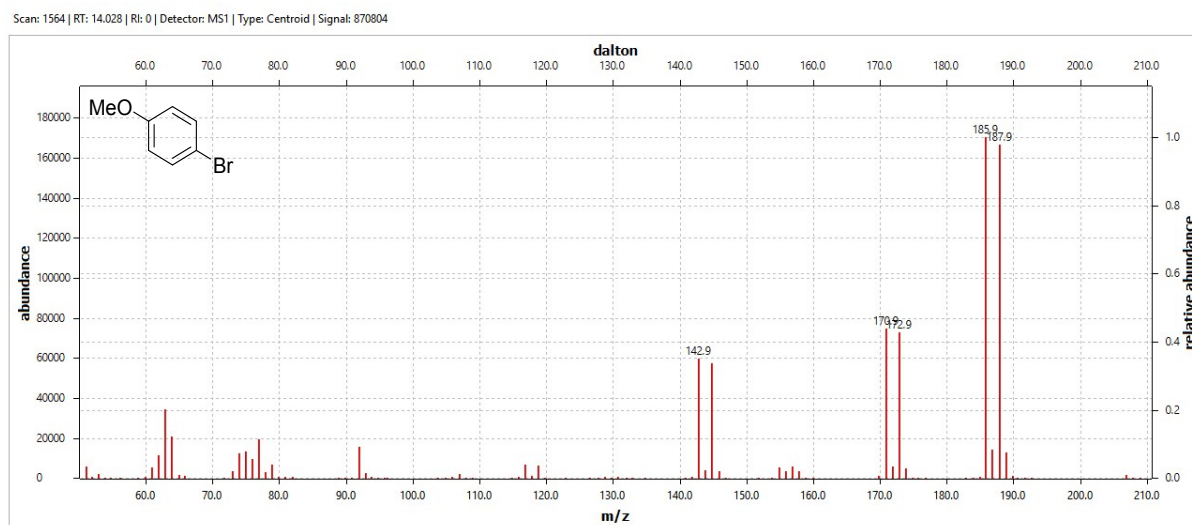

EI mass spectrum of *p*-bromoanisole (peak at RT(min)=14.028)

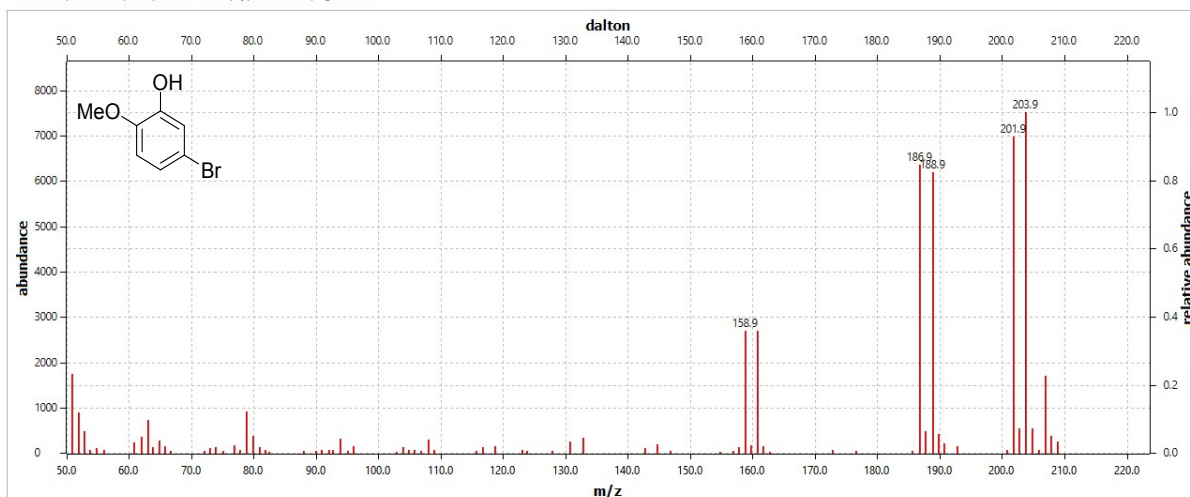

EI mass spectrum of 5-bromo-2-methoxyphenol, the only phenol product detected in the oxidation crude from the p-bromoanisole reaction (peak at RT(min)=16.843)

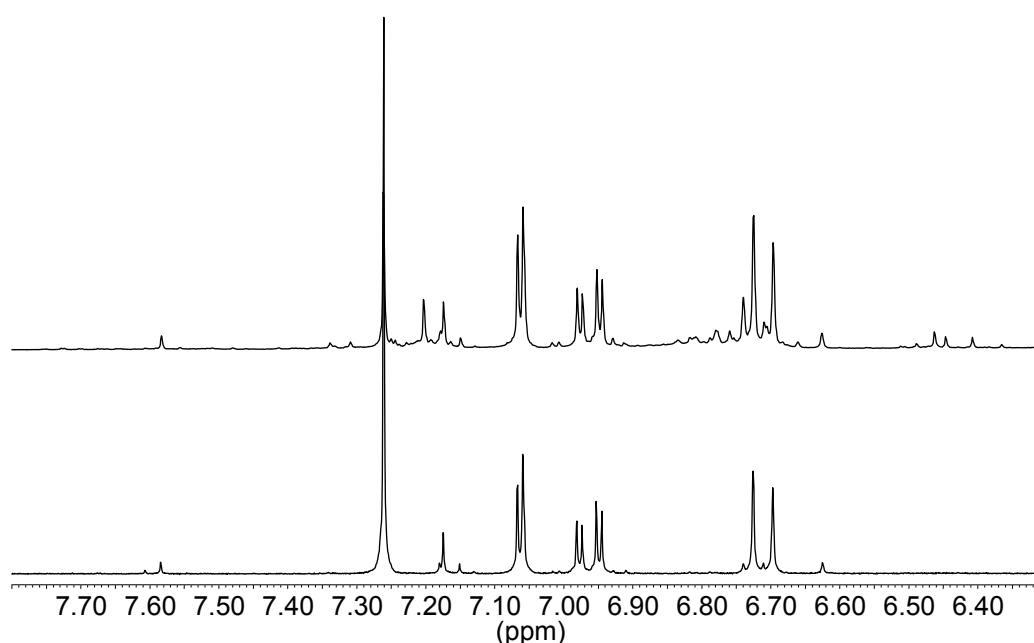

**Figure S1.**  $^1\text{H}$  NMR spectrum (aromatic region) of reaction crude obtained from the **1** catalyzed  $\text{H}_2\text{O}_2$  oxidation of 4-bromoanisole (top), and of 5-bromo-2-methoxyphenol (bottom) obtained by chromatography: ( $\text{CDCl}_3$ , 300 MHz)  $\delta$  (ppm) 7.06 (d,  $J = 2.4$  Hz, 1H), 6.96 (dd,  $J = 8.6$  and 2.4 Hz, 1H), 6.71 (d,  $J = 8.6$  Hz, 1H), 3.87 (not shown) (s, 3H). the signals are perfectly coincident with those reported by N. Fujikawa, T. Ohta, T. Yamaguchi T. Fukuda, F. Ishibashi, M. Iwoo, *Tetrahedron* 2006, **62**, 594-604. No trace of signals related to 2-bromo-5-methoxyphenol are found in these spectra (for  $\text{CDCl}_3$   $^1\text{H}$  NMR spectrum of 2-bromo-5-methoxyphenol see Y. Takashima, Y. Kaneko, Y. Kobayashi, *Tetrahedron* 2010, **66**, 197-207:  $^1\text{H}$  NMR (300 MHz,  $\text{CDCl}_3$ )  $\delta$  (ppm) 3.77 (s, 3H), 5.51 (s, 1H), **6.41** (dd,  $J = 9$ , 3 Hz, 1H), **6.60** (d,  $J = 3$  Hz, 1H), **7.31** (d,  $J = 9$  Hz, 1H)).

## *Oxidation in presence of a radical trap (bromotrichloromethane)*

Oxidation of benzene under Gif conditions (in the presence of sole  $\text{Fe}(\text{OTf})_2$ )

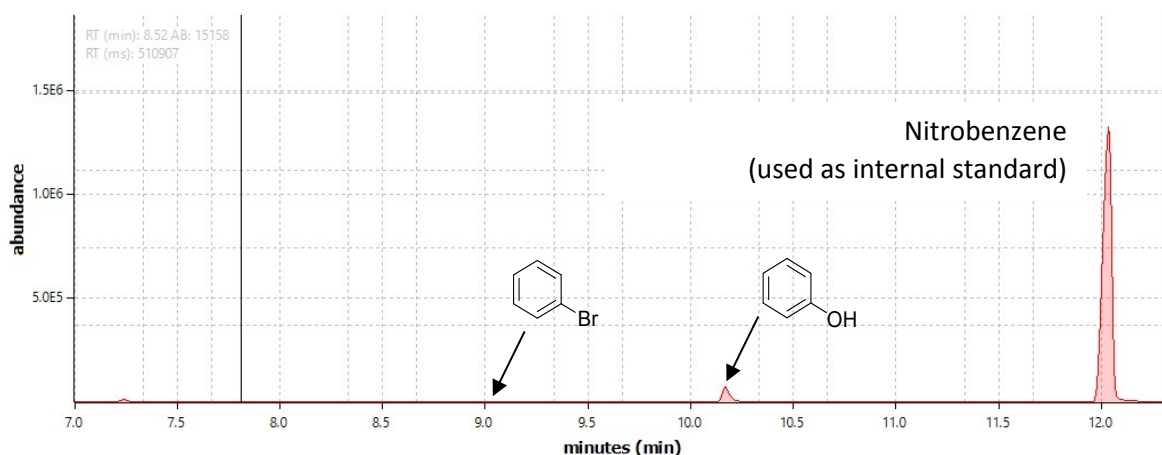

Oxidation of benzene under Fenton-type conditions ( $\text{Fe}(\text{CF}_3\text{SO}_3)_2(\text{CH}_3\text{CN})_2$  as catalyst) in the presence of bromotrichloromethane.

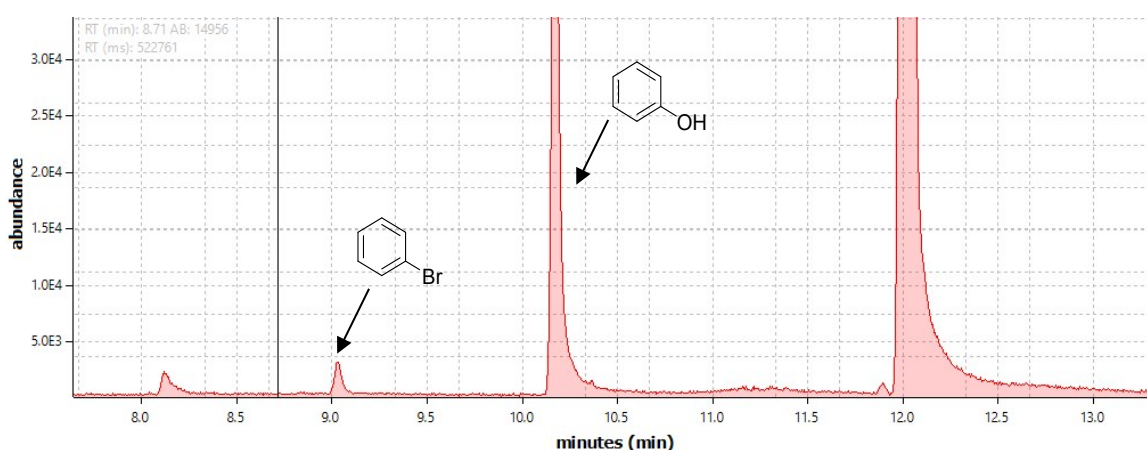

Oxidation of benzene under Gif conditions in the presence of bromotrichloromethane (zoom). Peak at 8.1 min is due to 1,4 quinone.

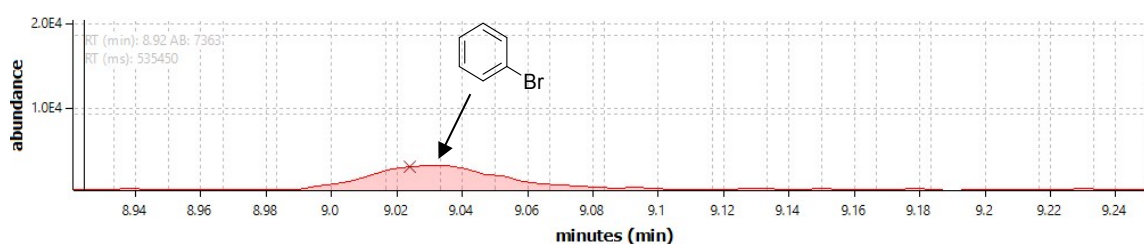

Oxidation of benzene under Fenton-type conditions ( $\text{Fe}(\text{CF}_3\text{SO}_3)_2(\text{CH}_3\text{CN})_2$  as catalyst) conditions in the presence of bromotrichloromethane (zoom on the bromobenzene peak at  $\text{RT}(\text{min}) = 9.024$ )

Scan: 802 | RT: 9.024 | RI: 0 | Detector: MS1 | Type: Centroid | Signal: 3122

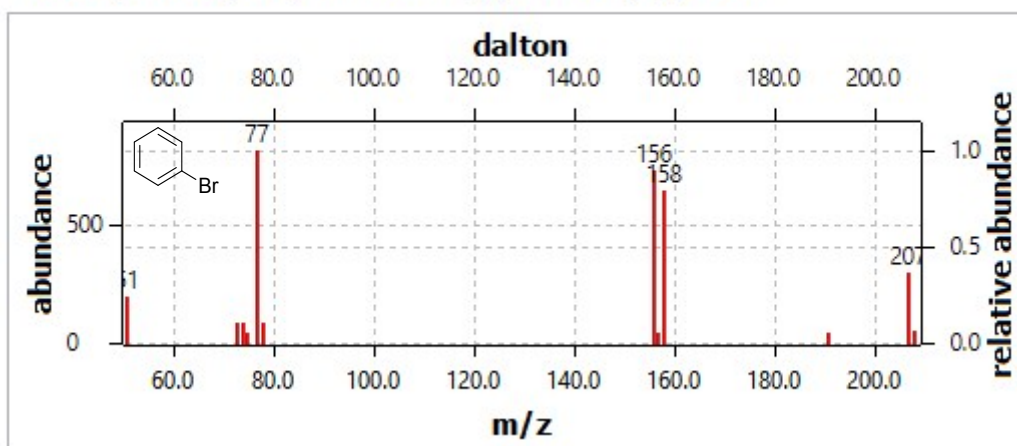

EI mass spectrum of bromobenzene at RT(min) = 9.024 generated during the oxidation of benzene under Gif conditions in the presence of bromotrichlorometane

Oxidation of benzene in the presence of catalyst **1**.

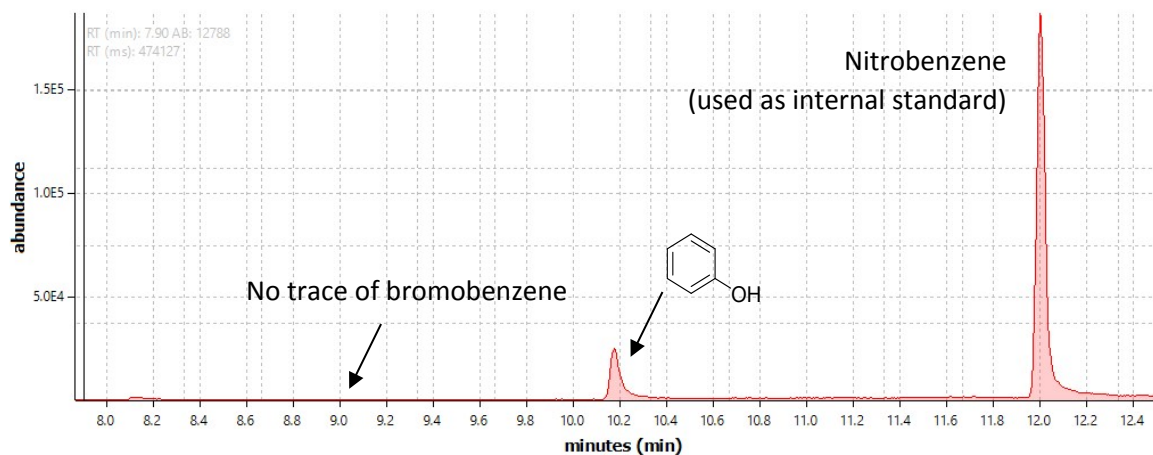

Oxidation of benzene catalysed by complex **1** in the presence of bromotrichloromethane



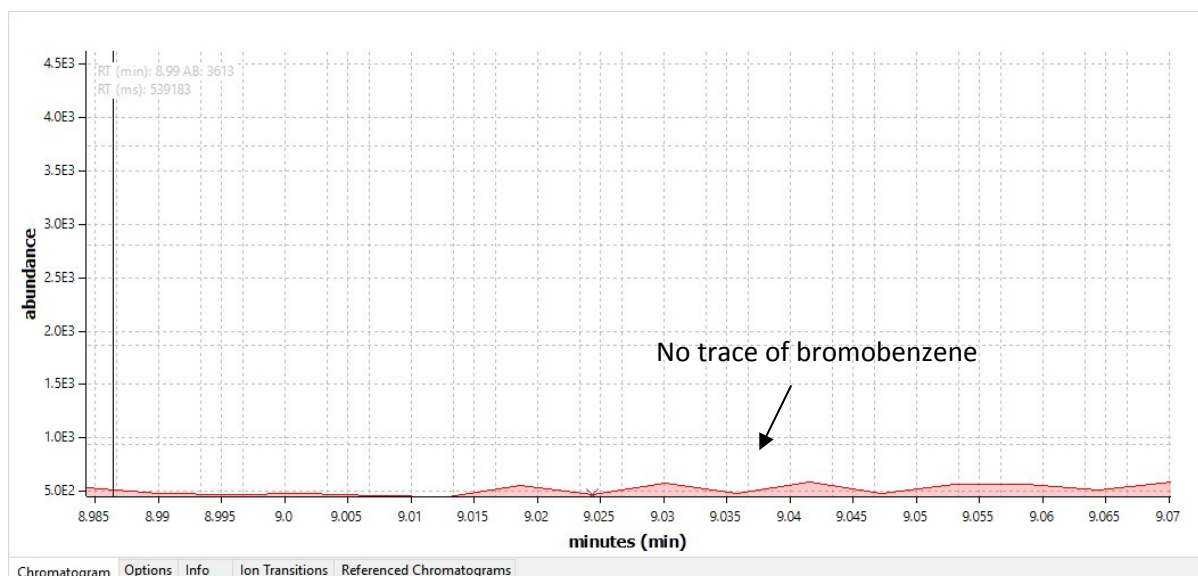

Oxidation of benzene catalysed by complex **1** in the presence of bromotrichloromethane (zoom on the area around RT(min) = 9.024: no peaks emerge from the background noise)

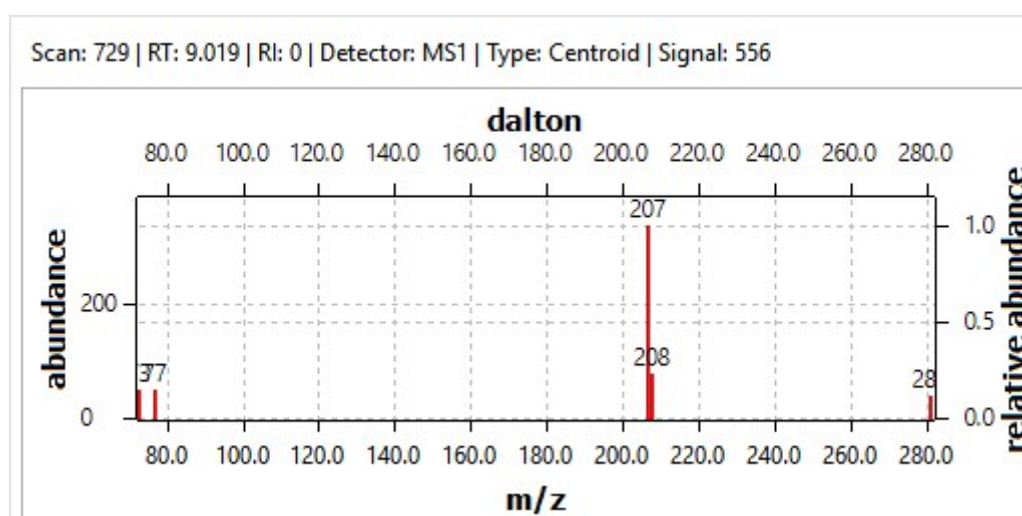

EI mass spectrum for RT (min) = 9.019: the spectrum shows no trace of bromobenzene

## Rearrangement experiments

### Oxidation of *p*-xylene (one of the runs of *p*-xylene oxidation)

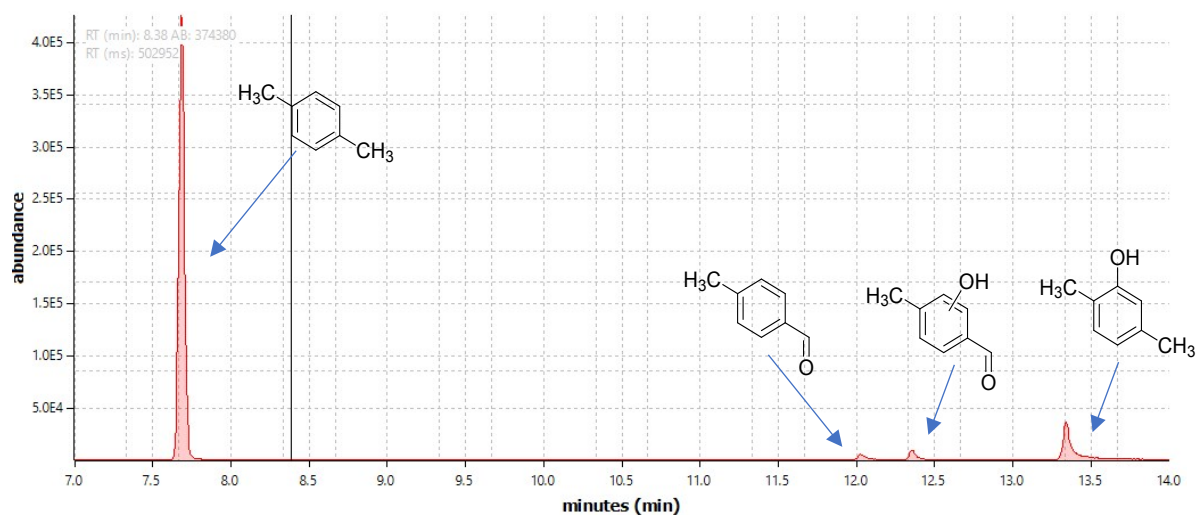

Chromatogram of crude mixture from the *p*-xylene oxidation

### Oxidation of *o*-xylene (one of the runs of *o*-xylene oxidation)

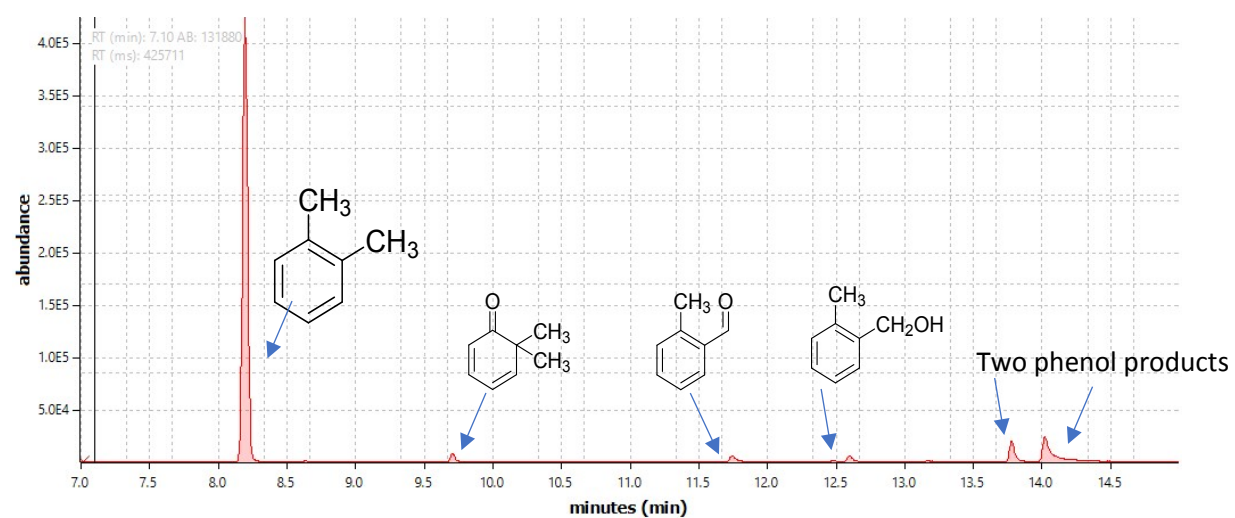

Chromatogram of crude mixture from the *o*-xylene oxidation

## Oxidation of phenyl benzoate

The reaction was performed as described in typical oxidation conditions, with 2.50  $\mu\text{mol}$  of in situ generated **1**, and 49.5 mg, 250  $\mu\text{mol}$  of phenyl benzoate. After the reaction, solvent was removed by rotatory evaporation and column chromatography ( $\text{SiO}_2$ , AcOEt:Hex 1:1, MeOH 1%) afforded substrate (24 mg, 121  $\mu\text{mol}$ , 48%), *ortho*-phenol along with traces of *meta*-phenol (12 mg, 56  $\mu\text{mol}$ , 22% yield, 12:1 ratio o/m) and *para*-phenol along with traces of *p*-benzoquinone (14 mg, 65  $\mu\text{mol}$ , 26% yield, 9:1 ratio). *Ortho* + *meta* phenols  $^1\text{H}$ -NMR (300 MHz,  $\text{CDCl}_3$ )  $\delta$ : 8.23 (dt,  $^2J = 6$  Hz,  $^3J = 3$  Hz, 2H), 7.78 (dt,  $J = 6$  Hz, 0.16 H), 7.67 (tt,  $^2J = 9$  Hz,  $^3J = 3$  Hz, 1H), 7.54 (t,  $J = 9$  Hz, 2H), 7.40 (m, 0.52 H), 7.19 (td,  $^2J = 6$  Hz,  $^3J = 2$  Hz, 2H), 7.06 (dt,  $^2J = 9$  Hz,  $^3J = 2$  Hz, 1H), 6.98 (td,  $^2J = 9$  Hz,  $^3J = 2$  Hz, 1H), 5.55 (s, 1H).  $^{13}\text{C}$ -NMR (300 MHz,  $\text{CDCl}_3$ )  $\delta$ : 165.0, 147.2, 138.8, 134.1, 130.4, 129.5, 128.7, 127.2, 122.5, 121.6, 121.2, 118.1, 116.7. HRMS ( $\text{C}_{13}\text{H}_{10}\text{O}_3 + \text{H}^+$ ): calcd 215.0703, found 215.0698. *para*-phenol and *p*-benzoquinone:  $^1\text{H}$ -NMR (300 MHz,  $\text{CDCl}_3$ )  $\delta$ : 8.20 (dt,  $^2J = 3$  Hz,  $^3J = 3$  Hz, 2H), 8.10 (dt,  $J = 9$  Hz, 0.25 H), 7.64 (tt,  $^2J = 9$  Hz,  $^3J = 3$  Hz, 1H), 7.51 (tt,  $^2J = 9$  Hz,  $^3J = 3$  Hz, 2H), 7.40 (m, 0.25 H), 7.20 (m, 0.4 H), 7.05 (dd,  $^2J = 9$  Hz,  $^3J = 2$  Hz, 2H), 6.88 (m, 0.30 H), 6.82 (dd,  $^2J = 9$  Hz,  $^3J = 2$  Hz, 2H), 5.47 (s, 1H).  $^{13}\text{C}$ -NMR (300 MHz,  $\text{CDCl}_3$ )  $\delta$ : 166.0, 153.50, 144.2, 133.6, 130.2, 129.4, 128.6, 122.5, 121.8, 116.1, 115.4. HRMS ( $\text{C}_{13}\text{H}_{10}\text{O}_3 + \text{H}^+$ ): calcd 215.0703, found 215.0695.

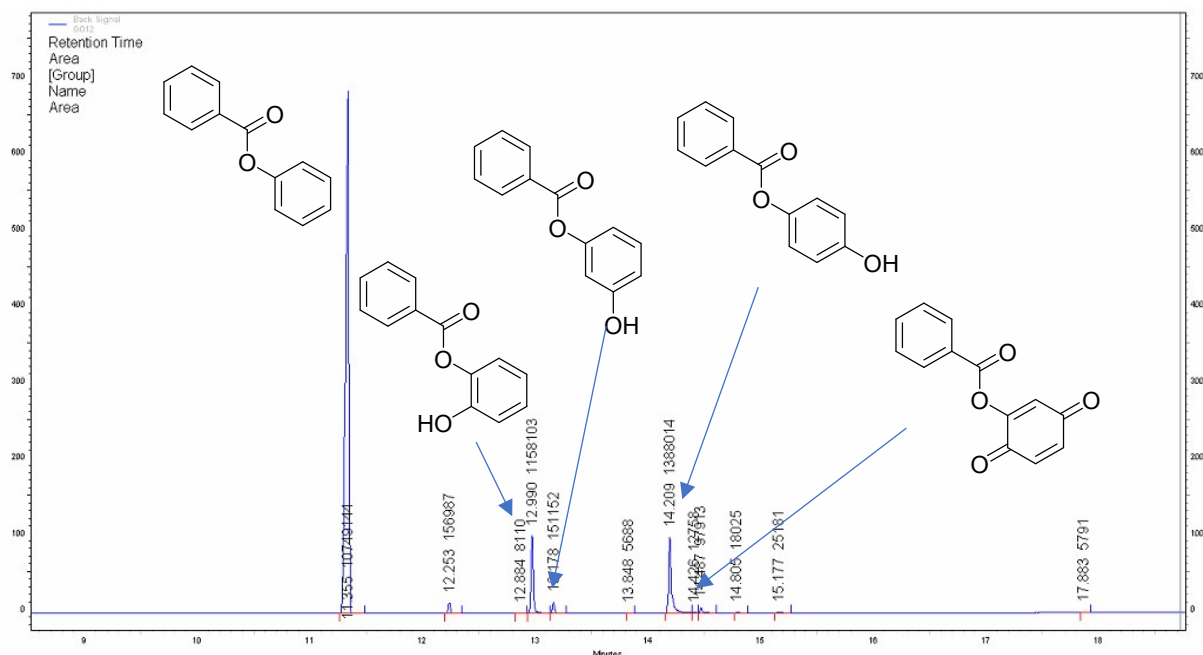

GC chromatogram of phenylbenzoate oxidation catalysed by **1**.

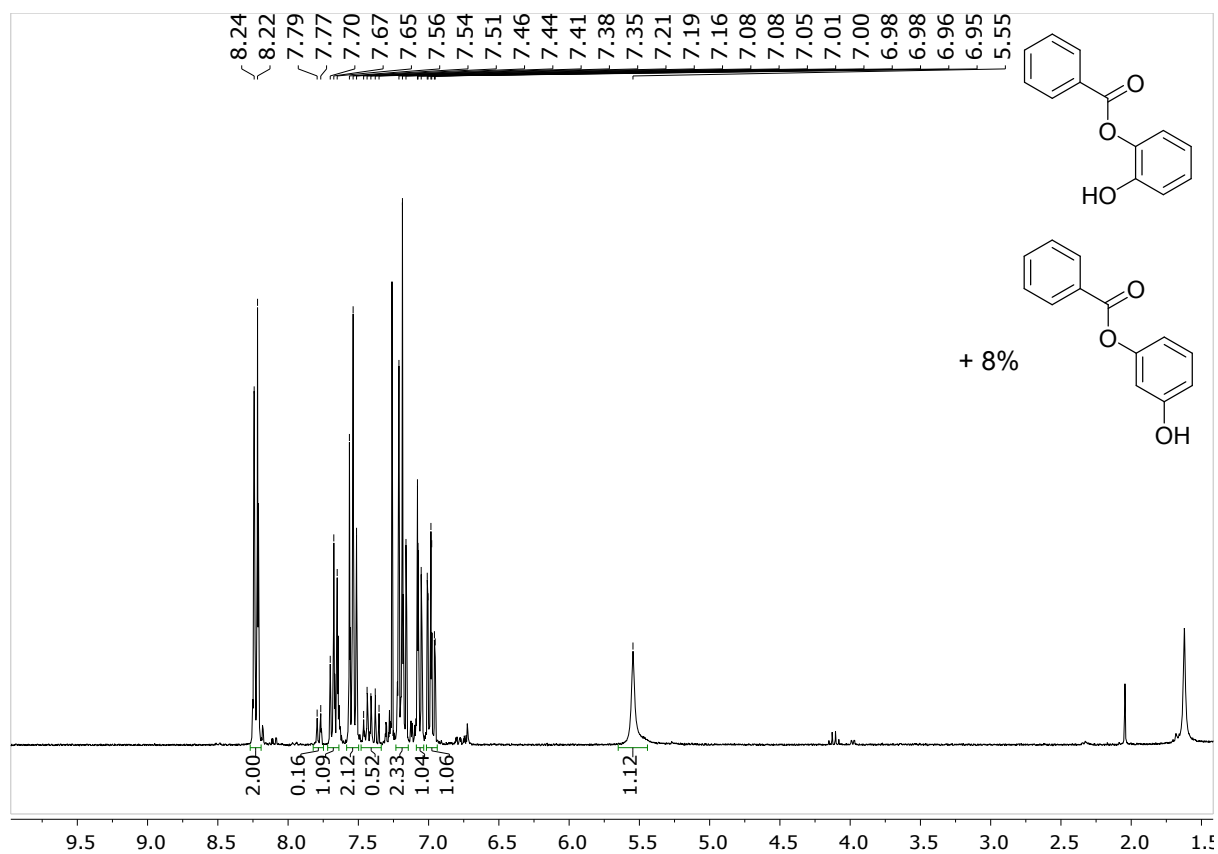

<sup>1</sup>H-NMR of *ortho* + *meta* phenols

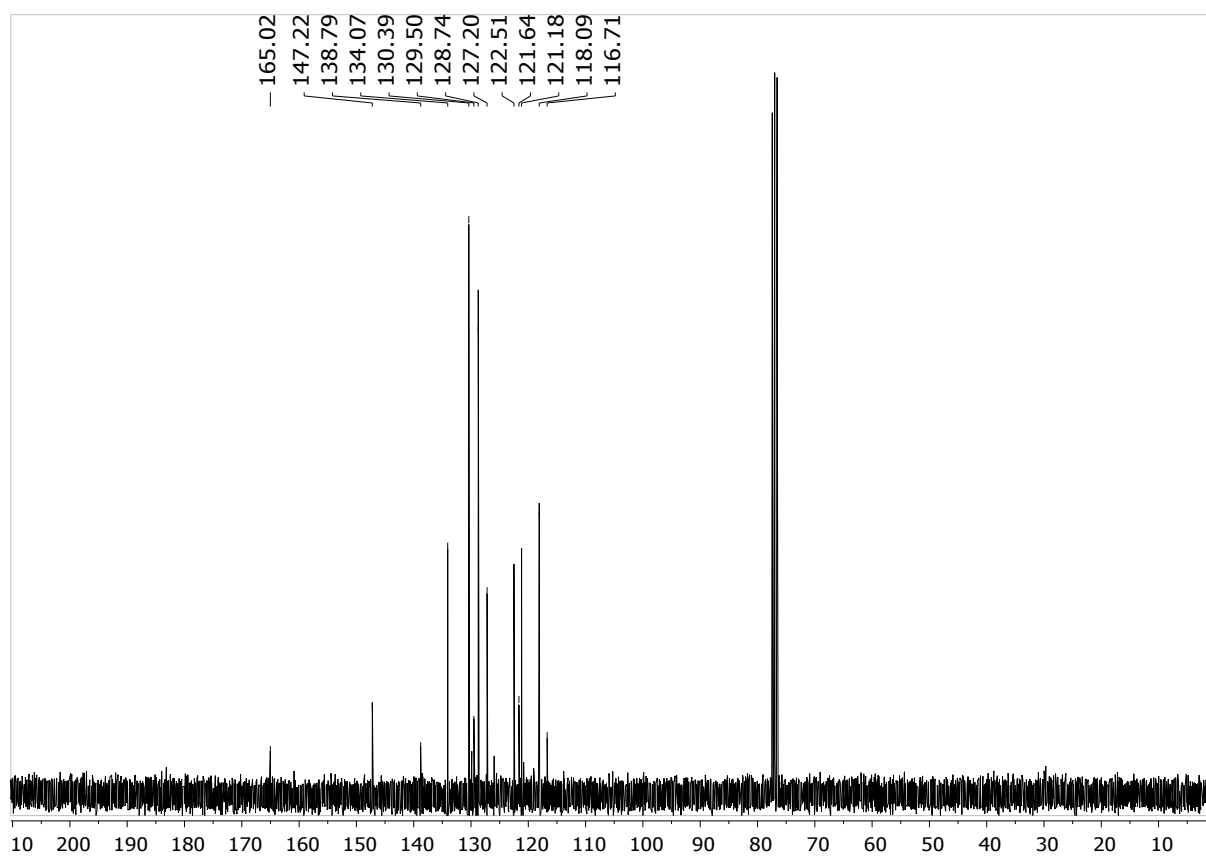

<sup>13</sup>C-NMR of *ortho* + *meta* phenols

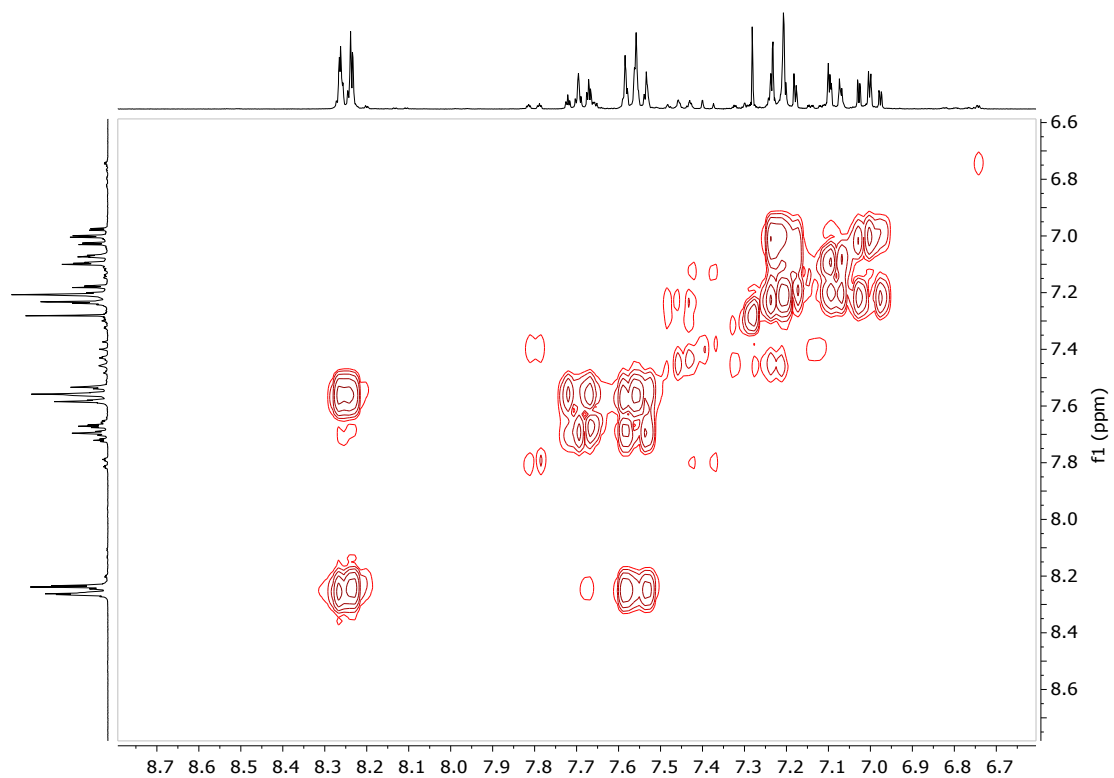

COSY of *ortho* + *meta* phenols (aromatic region)

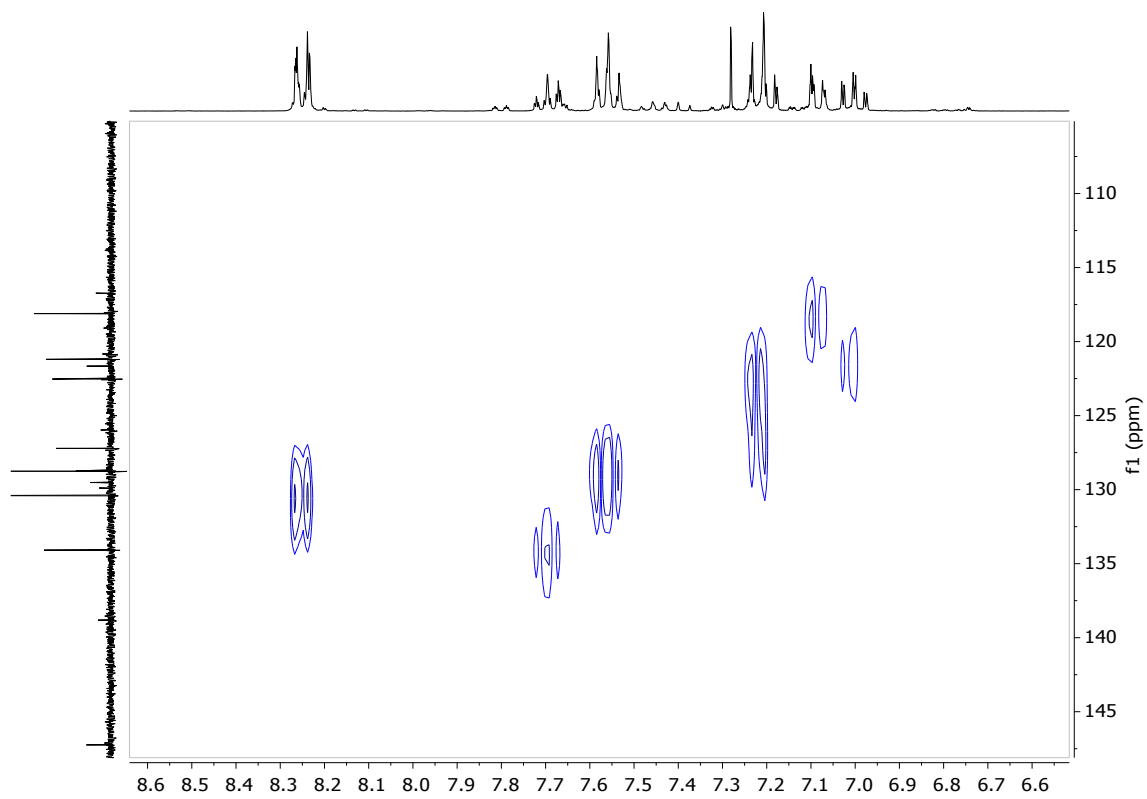

HSQC of *ortho* + *meta* phenols (aromatic region)

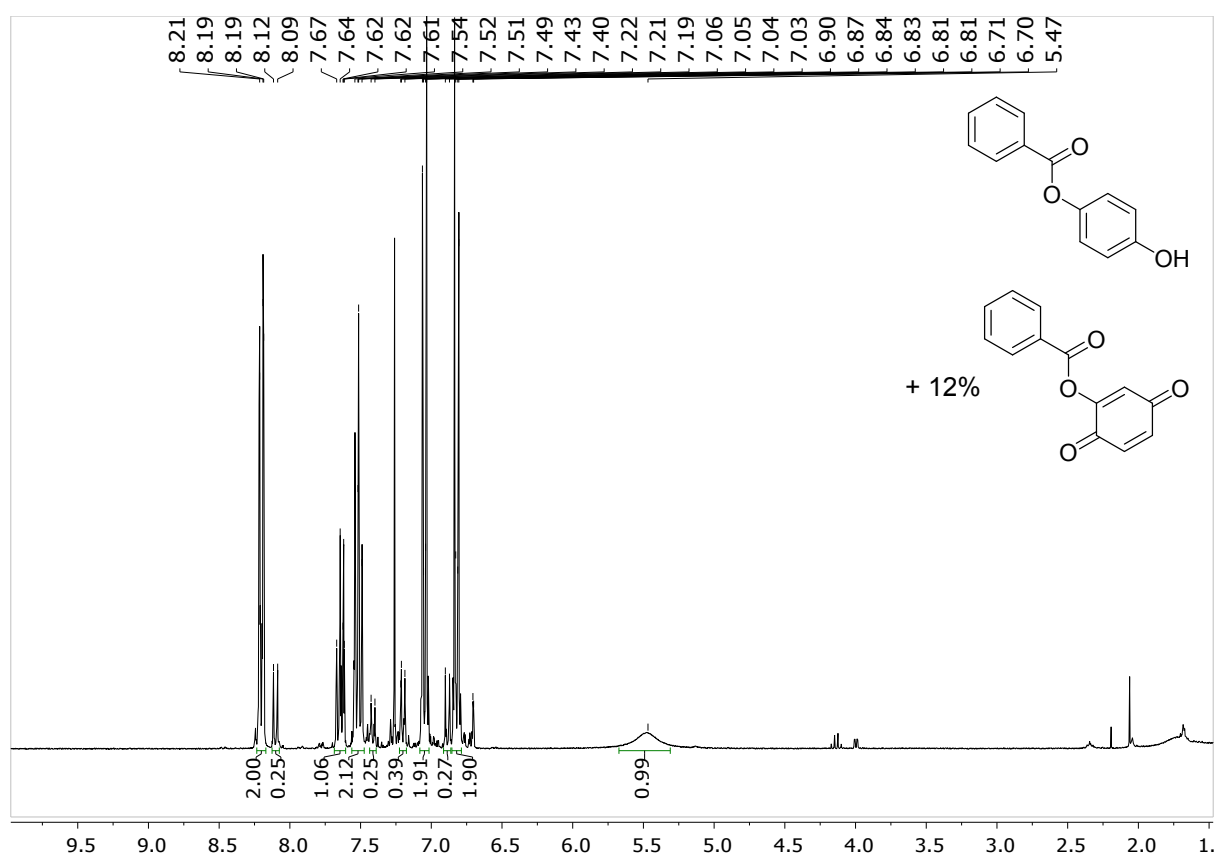

$^1\text{H}$ -NMR of *para*-phenol and *p*-benzoquinone

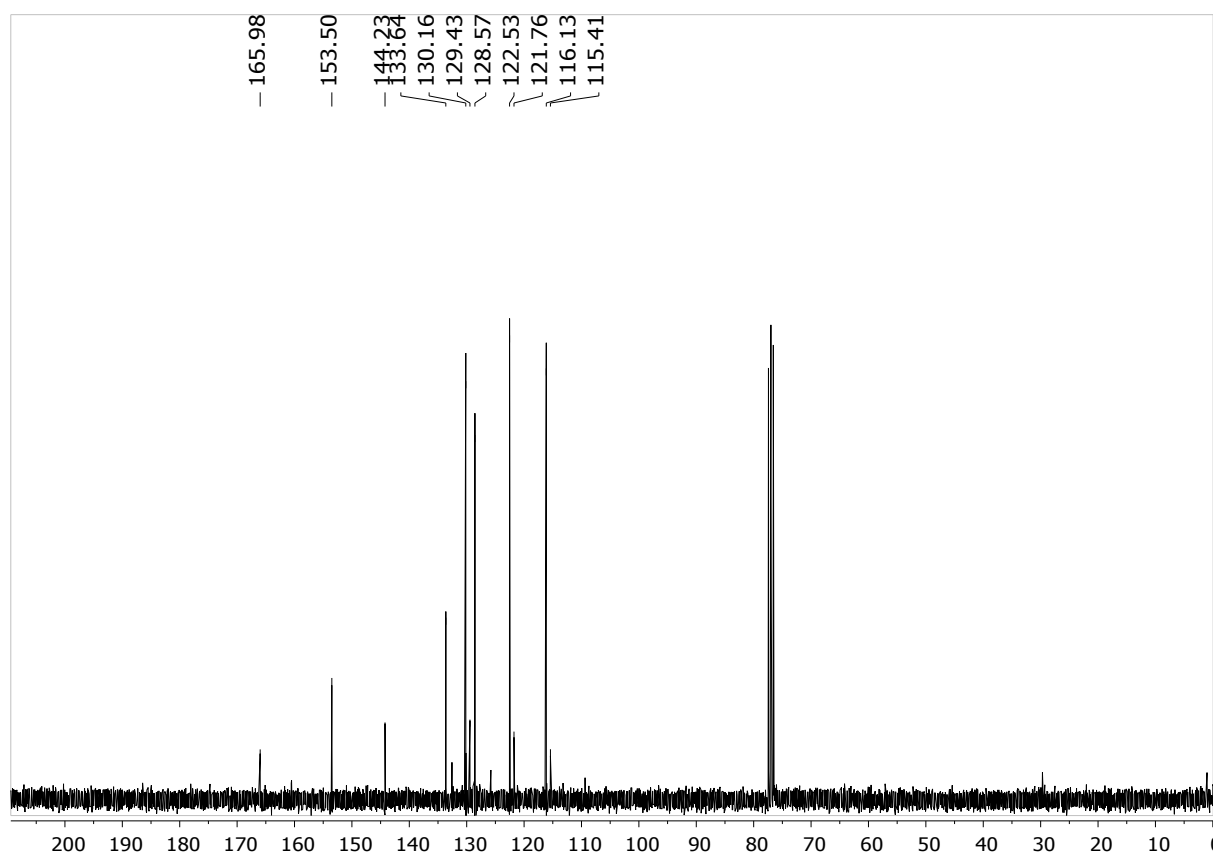

$^{13}\text{C}$ -NMR of *para*-phenol and *p*-benzoquinone

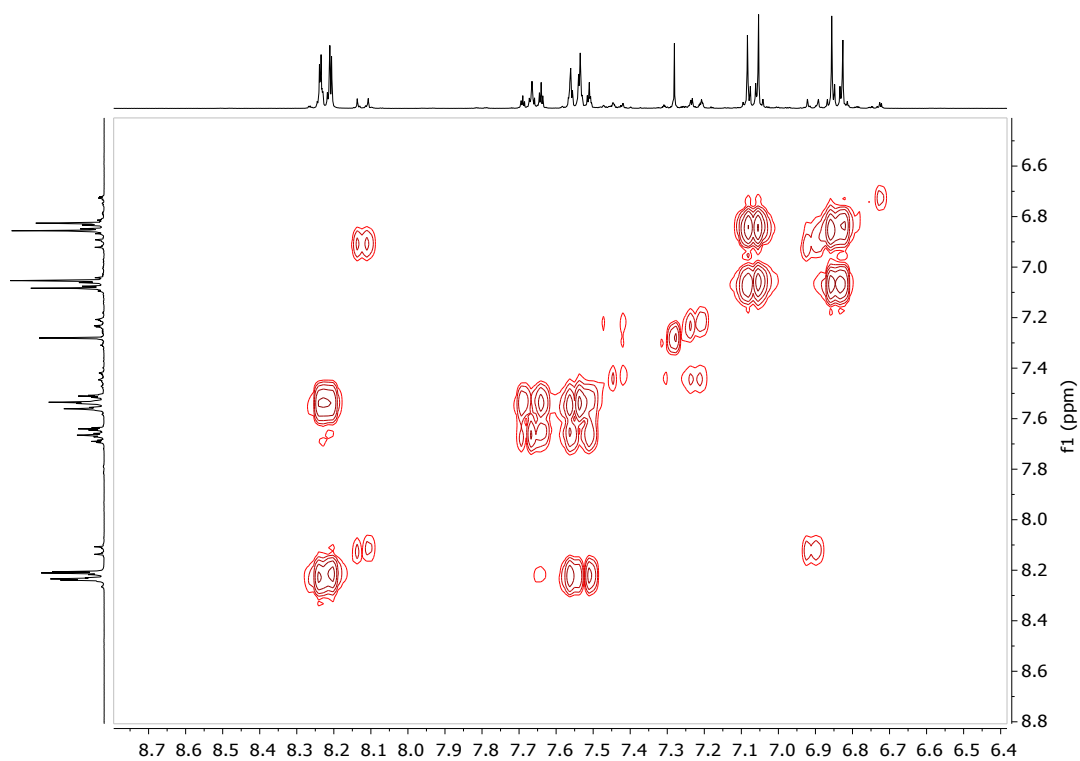

COSY of *para*-phenol and *p*-benzoquinone (aromatic region)

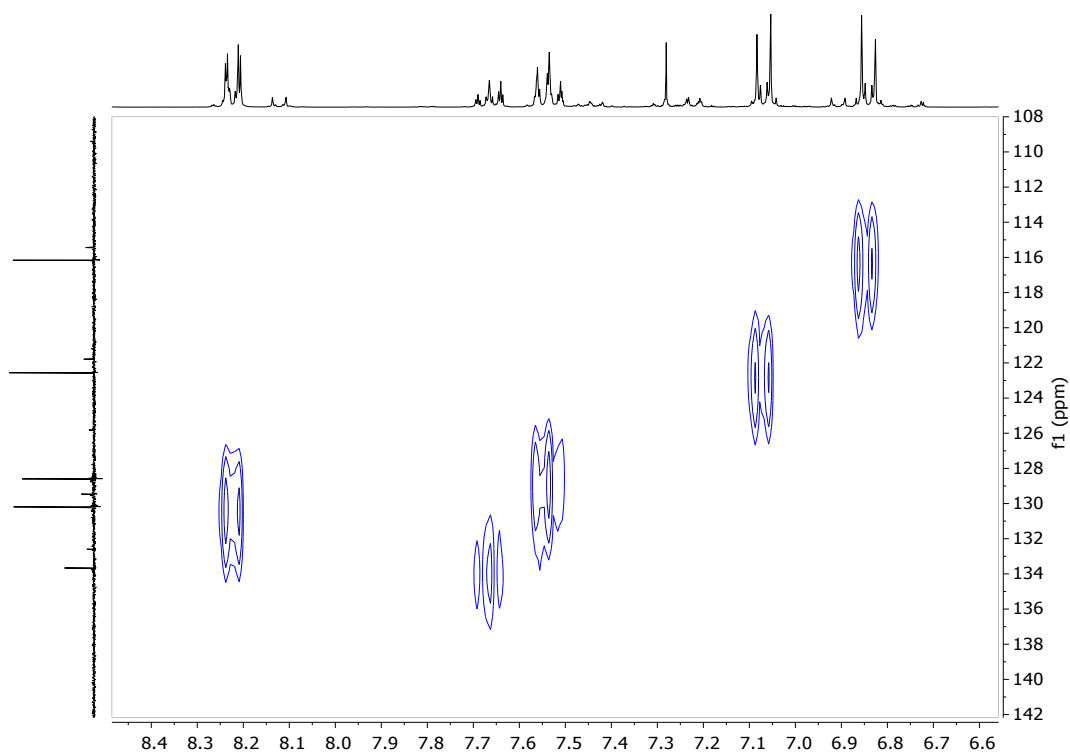

HSQC of *para*-phenol and *p*-benzoquinone (aromatic region)

## Oxidation of cyclopropylbenzene

The reaction was performed as described in typical oxidation conditions, with 2.50  $\mu\text{mol}$  of in situ generated **1**, and 29.5 mg, 250  $\mu\text{mol}$  of cyclopropylbenzene. After the reaction, solvent was removed by rotatory evaporation and column chromatography ( $\text{SiO}_2$ , AcOEt:Hex 1:2, MeOH 1%) afforded substrate (18 mg, 152  $\mu\text{mol}$ , 58%), *ortho*-phenol and *meta*-phenol with traces of *p*-benzoquinone (7.0 mg, 52  $\mu\text{mol}$ , 21% yield, 8:1:1 ratio o/m/quinone ) and *para*-phenol (5.9 mg, 44  $\mu\text{mol}$ , 18% yield). *Ortho*-phenol and *meta*-phenol with traces of *p*-benzoquinone  $^1\text{H}$ -NMR (300 MHz,  $\text{CDCl}_3$ )  $\delta$ : 8.56 (dst,  $^2J = 3 \text{ Hz}$ ,  $^3J = 1.5 \text{ Hz}$ , 0.21 H), 7.89 (dt,  $J = 6 \text{ Hz}$ , 0.25 H), 7.64 (t,  $J = 3 \text{ Hz}$ , 0.26H), 7.24 (m, 0.24 H), 7.10 (dt,  $^2J = 8 \text{ Hz}$ ,  $^3J = 6 \text{ Hz}$ , 2H), 6.86 (d,  $J = 8 \text{ Hz}$ , 2 H), 6.79 (m, 0.41 H), 6.70 (m, 0.18 H), 6.15 (m, 0.26 H), 2.06 (m, 0.47 H), 1.82 (m, 1 H), 1.12 (qq, 0.97 H), 0.97 (qq,  $^2J = 6 \text{ Hz}$ ,  $^3J = 3 \text{ Hz}$ , 2H), 0.76 (qq,  $^2J = 6 \text{ Hz}$ ,  $^3J = 3 \text{ Hz}$ , 0.77H), 0.65 (qq,  $^2J = 6 \text{ Hz}$ ,  $^3J = 3 \text{ Hz}$ , 2H).  $^{13}\text{C}$ -NMR (300 MHz,  $\text{CDCl}_3$ )  $\delta$ : 136.5, 136.3, 128.6, 127.7, 126.3, 121.3, 120.3, 114.5, 32.7, 29.7, 11.2, 9.23, 5.37. *Para*-phenol  $^1\text{H}$ -NMR (300 MHz,  $\text{CDCl}_3$ )  $\delta$ : 6.97 (d,  $J = 6 \text{ Hz}$ , 2H), 6.73 (d,  $J = 6 \text{ Hz}$ , 2 H), 4.59 (s, 1H), 1.84 (m, 1H), 0.88 (qq,  $^2J = 9 \text{ Hz}$ ,  $^3J = 2 \text{ Hz}$ , 2H), 0.64 (qq,  $^2J = 9 \text{ Hz}$ ,  $^3J = 2 \text{ Hz}$ , 2H).  $^{13}\text{C}$ -NMR (300 MHz,  $\text{CDCl}_3$ )  $\delta$ : 153.3, 136.0, 127.0, 115.1, 14.6, 8.50. HRMS ( $\text{C}_9\text{H}_{10}\text{O} + \text{H}^+$ ): calcd 135.0804, found 135.0800.



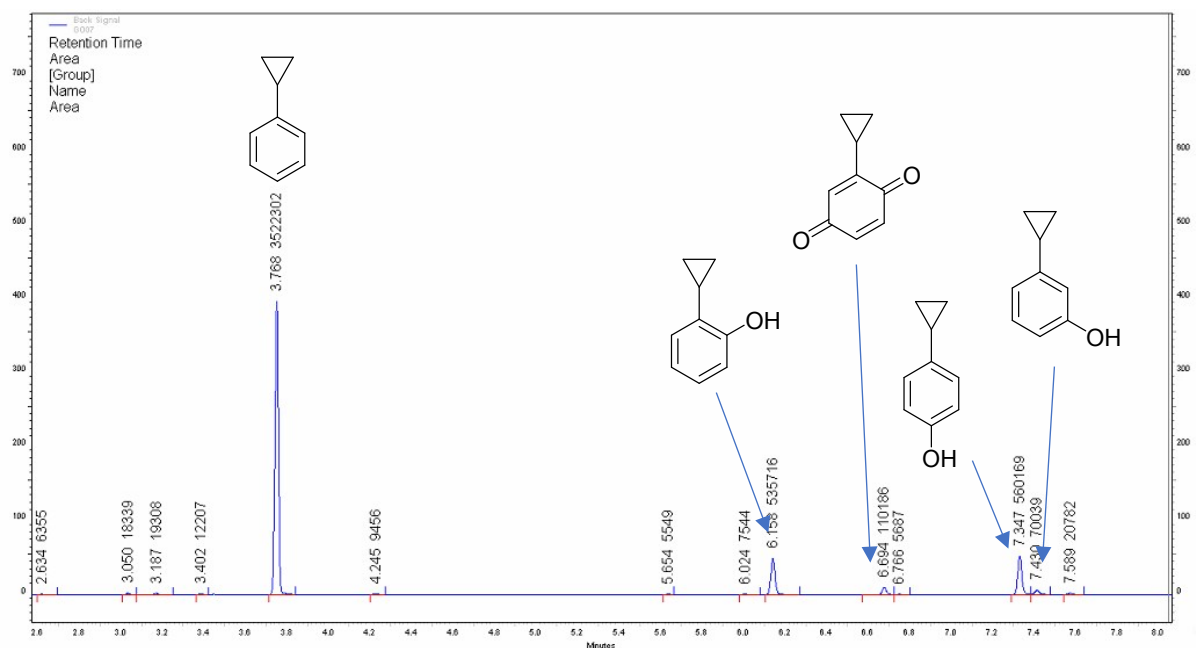

GC chromatogram of cyclopropylbenzene oxidation catalysed by **1**.

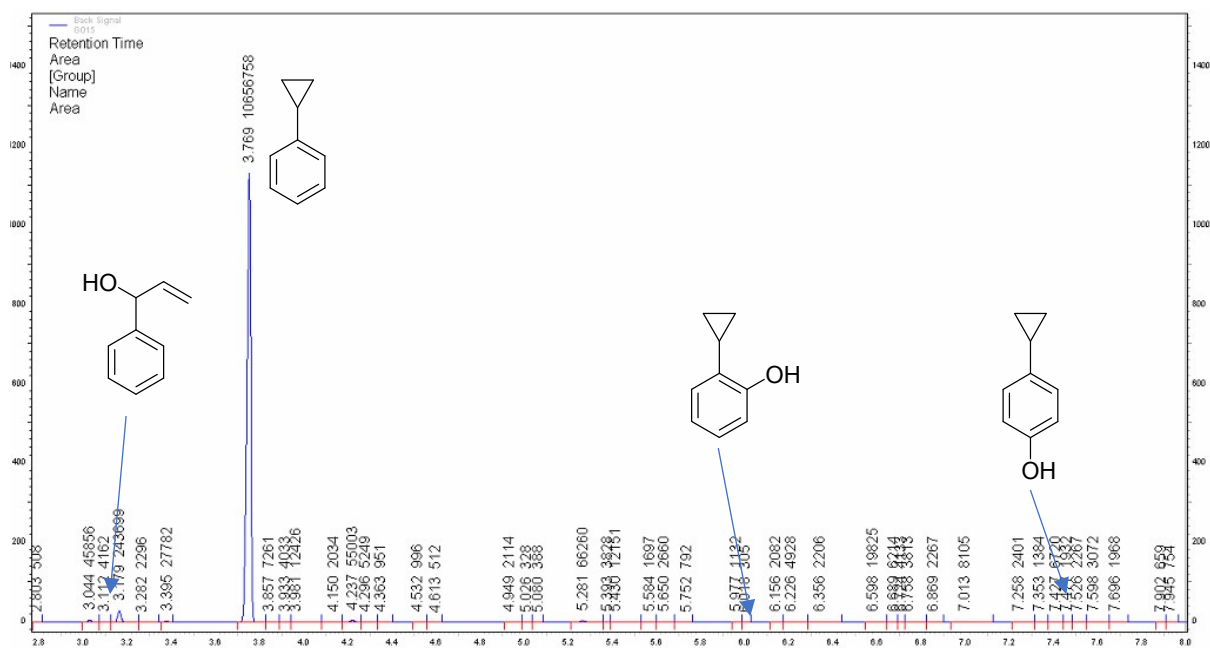

GC chromatogram of cyclopropylbenzene oxidation catalysed by  $\text{Fe}(\text{CF}_3\text{SO}_3)_2(\text{CH}_3\text{CN})_2$  (Fenton-type conditions)

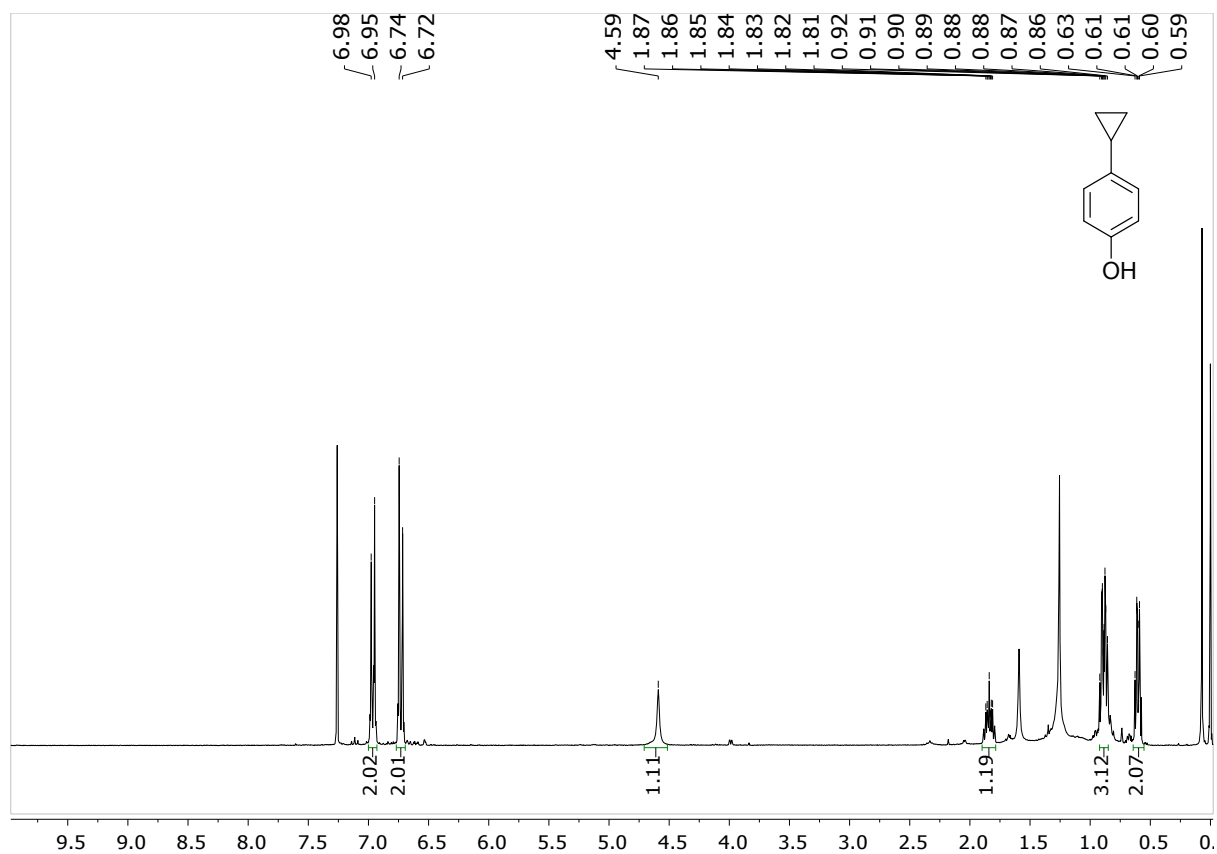

<sup>1</sup>H-NMR of *para*-phenol

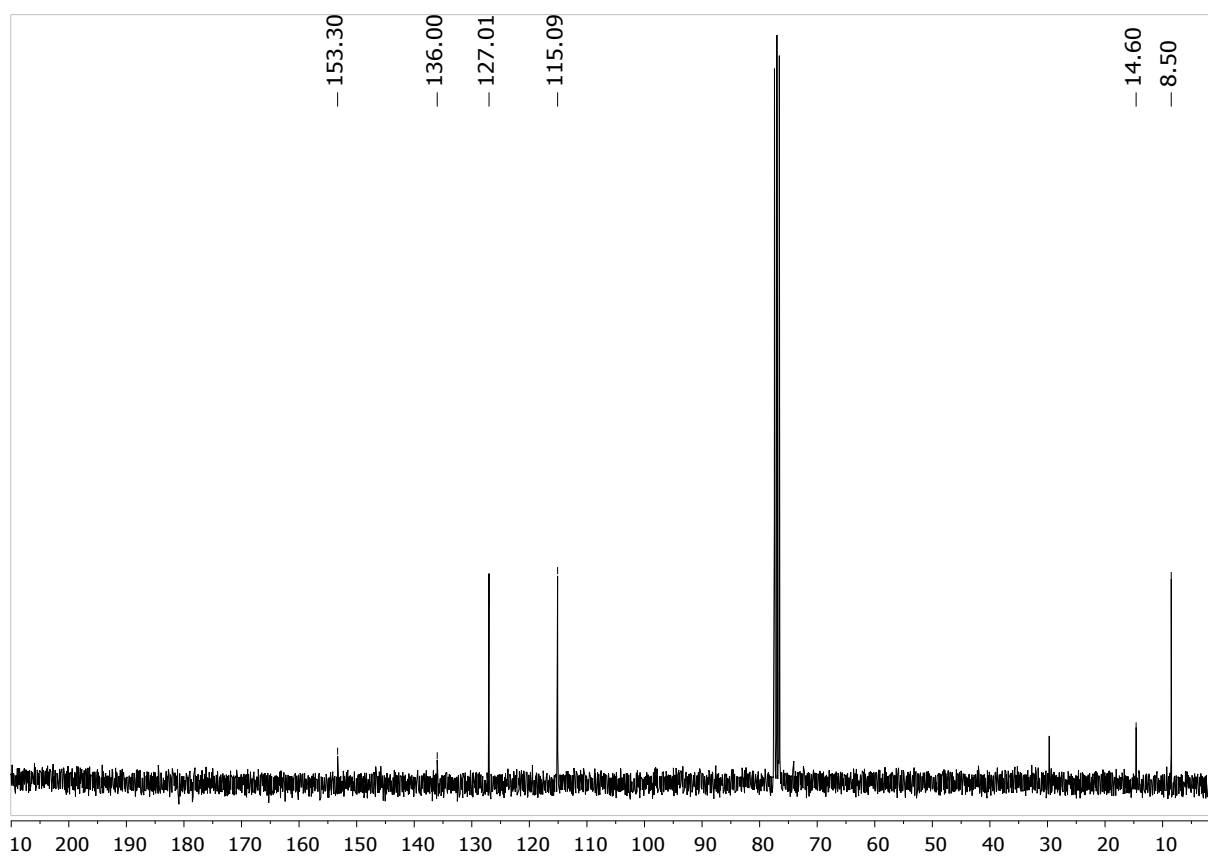

<sup>13</sup>C-NMR of *para*-phenol

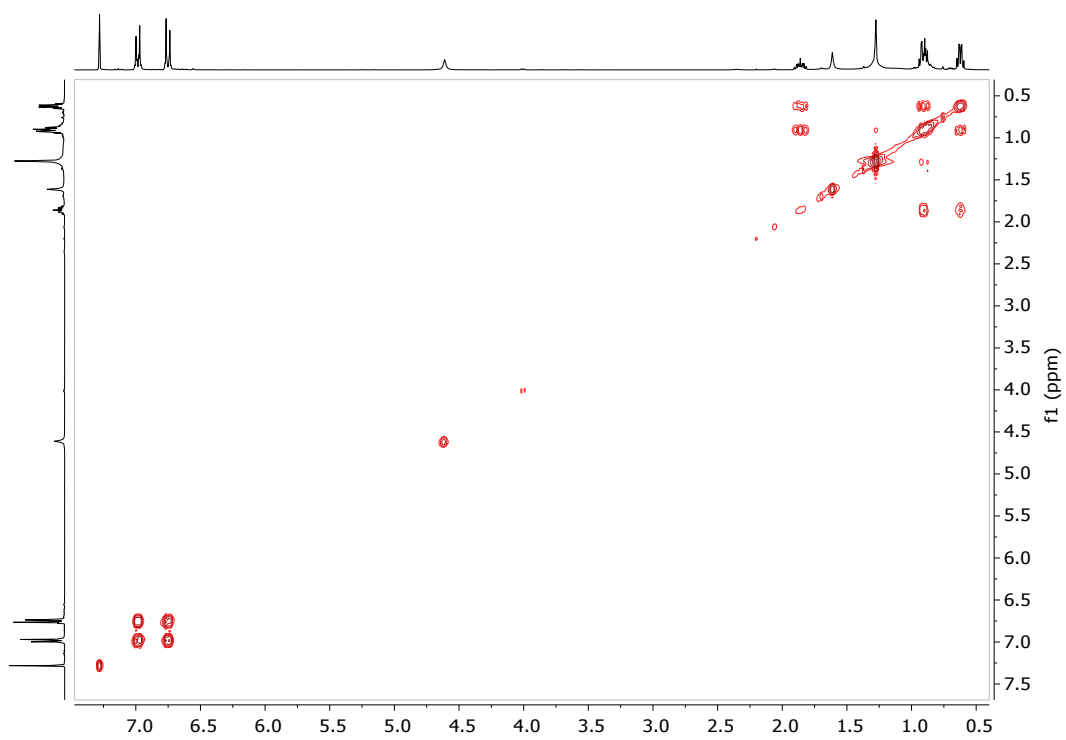

COSY of *para*-phenol

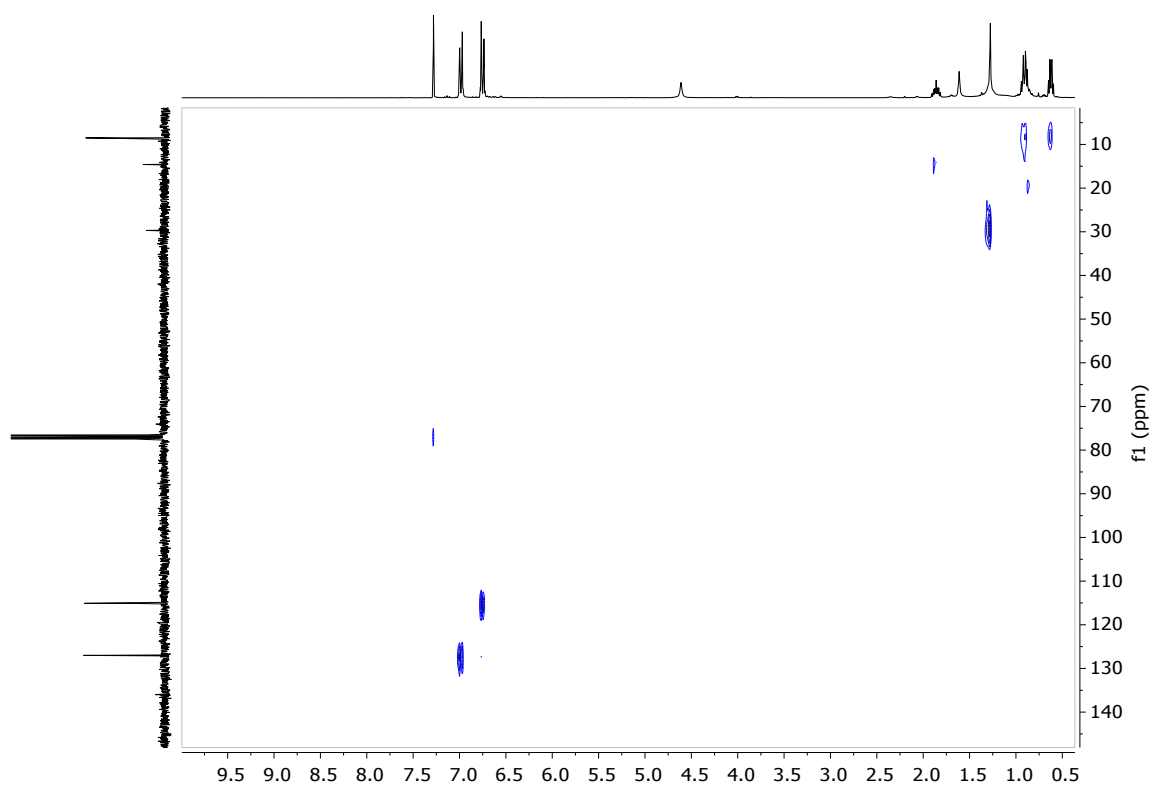

HSQC of *para*-phenol

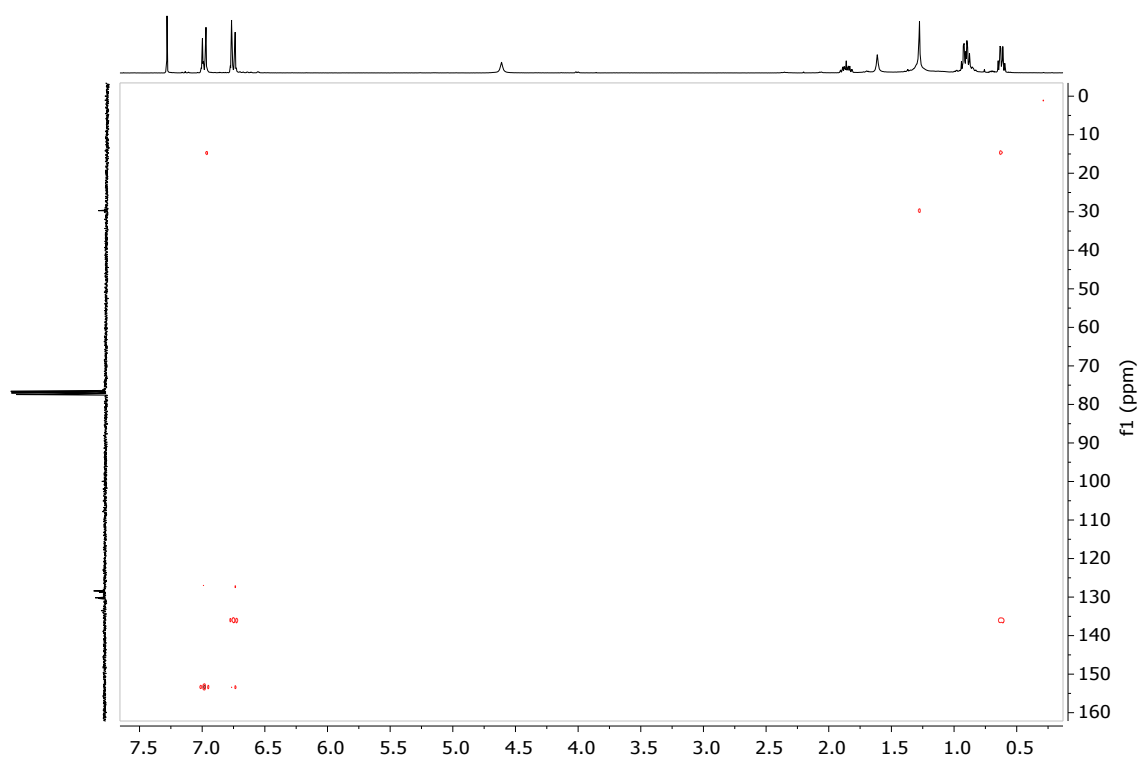

HMBC of *para*-phenol

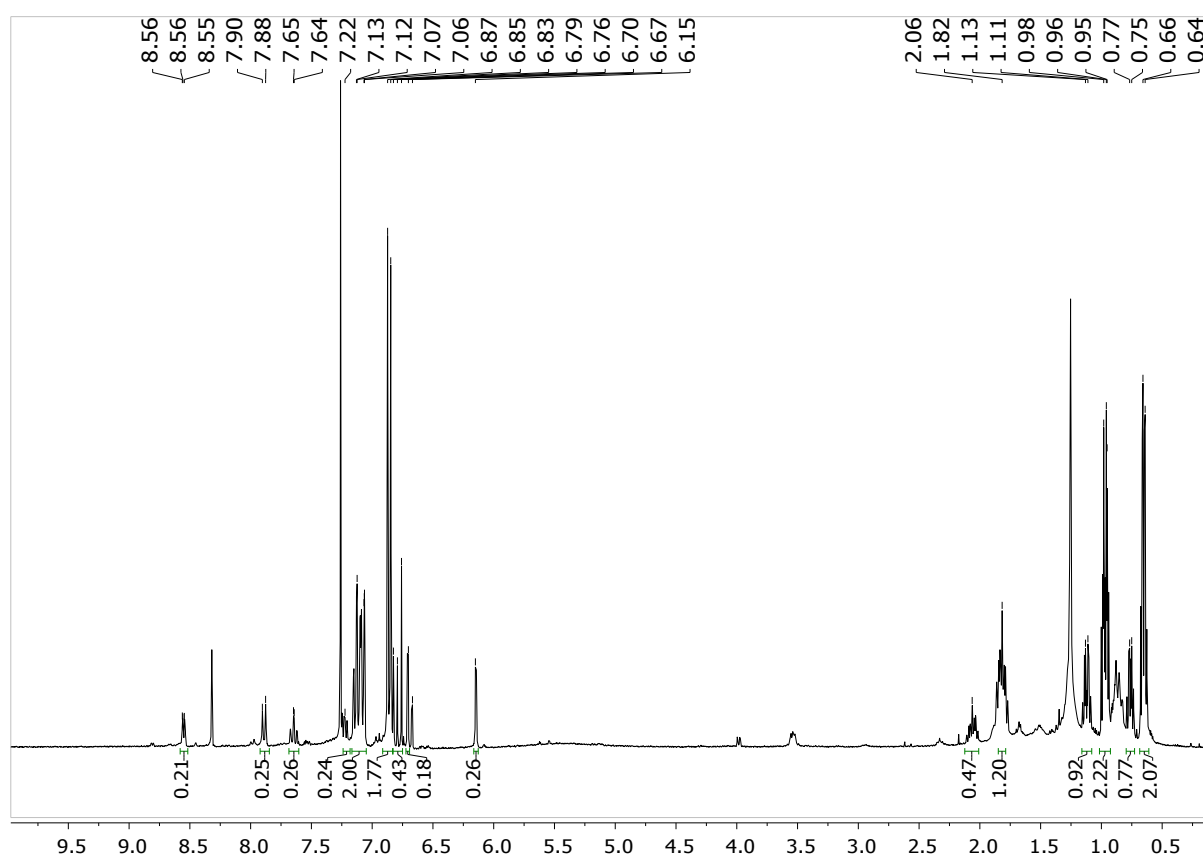

$^1\text{H}$ -NMR of *ortho*-phenol and *meta*-phenol with traces of *p*-benzoquinone

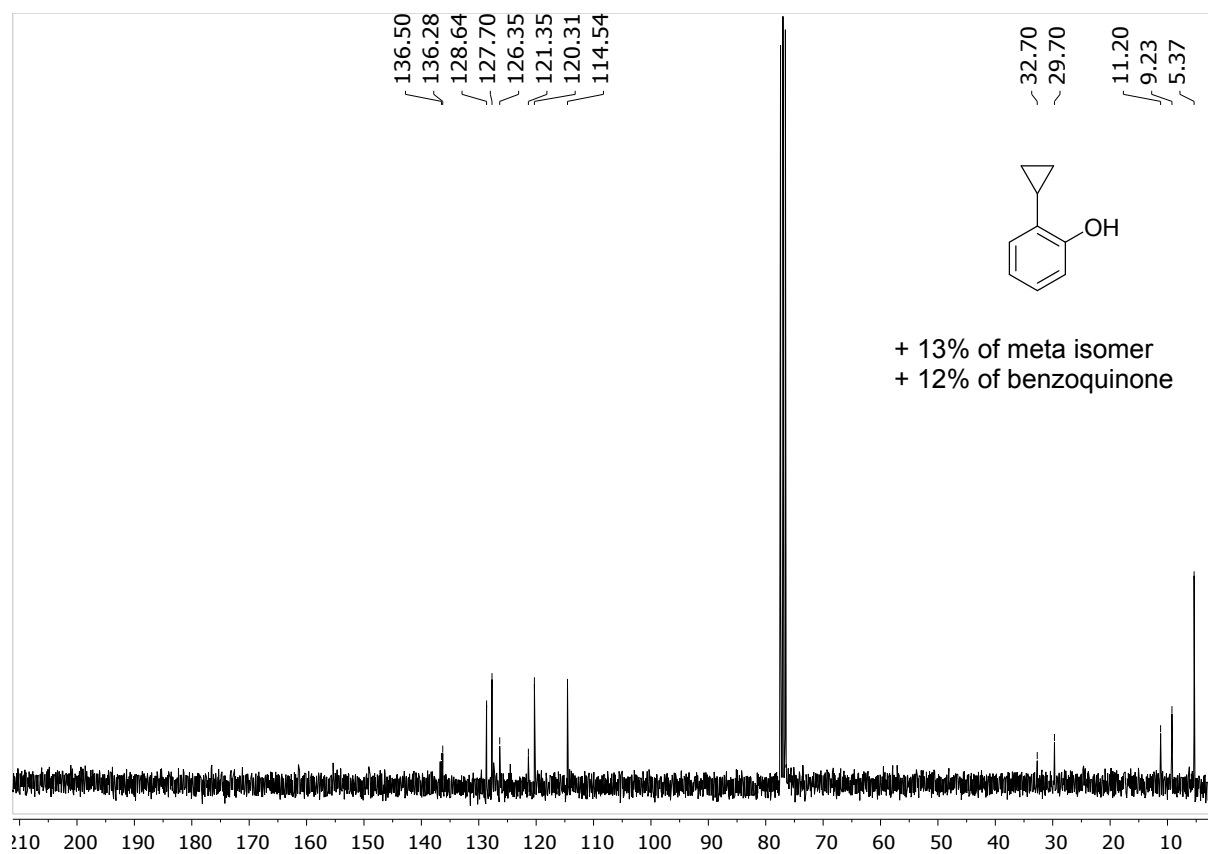

$^{13}\text{C}$ -NMR of *ortho*-phenol and *meta*-phenol with traces of *p*-benzoquinone

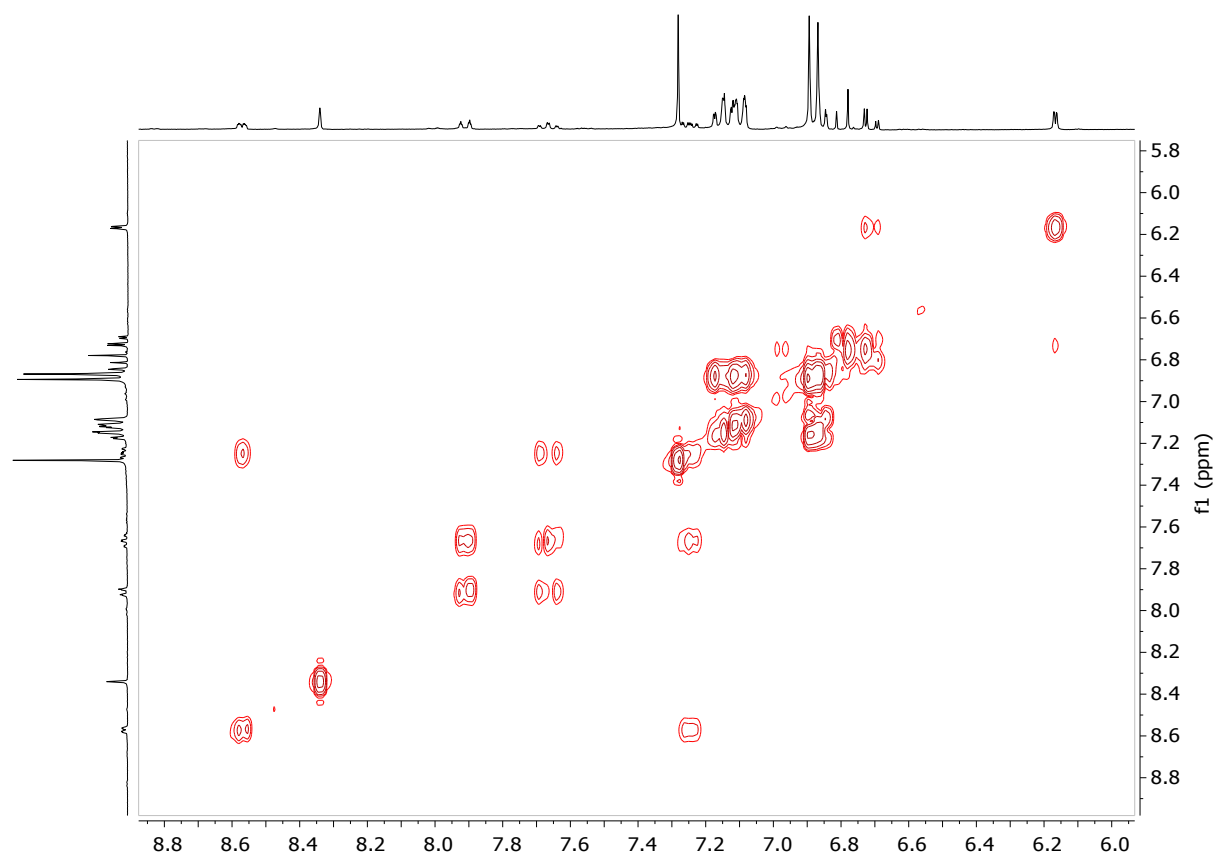

COSY of *ortho*-phenol and *meta*-phenol with traces of *p*-benzoquinone (aromatic region)

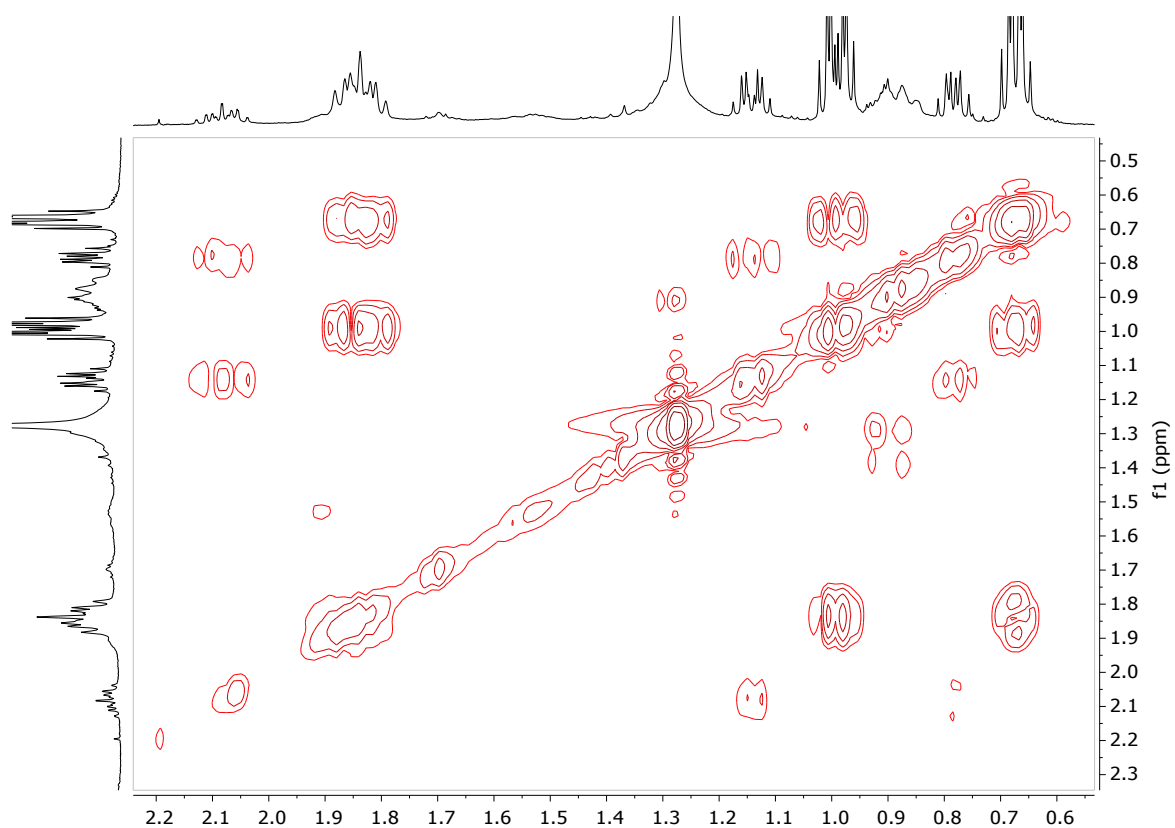

COSY of *ortho*-phenol and *meta*-phenol with traces of *p*-benzoquinone (aliphatic region)

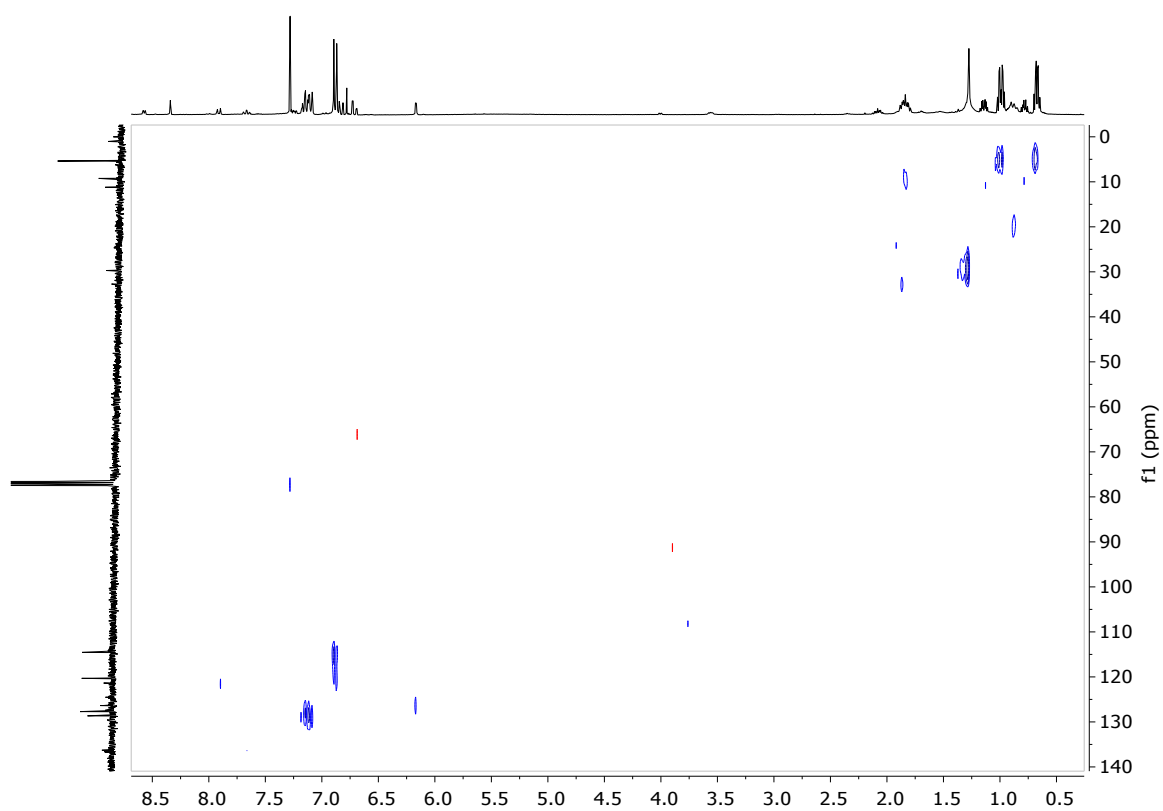

HSQC of *ortho*-phenol and *meta*-phenol with traces of *p*-benzoquinone (aromatic region)

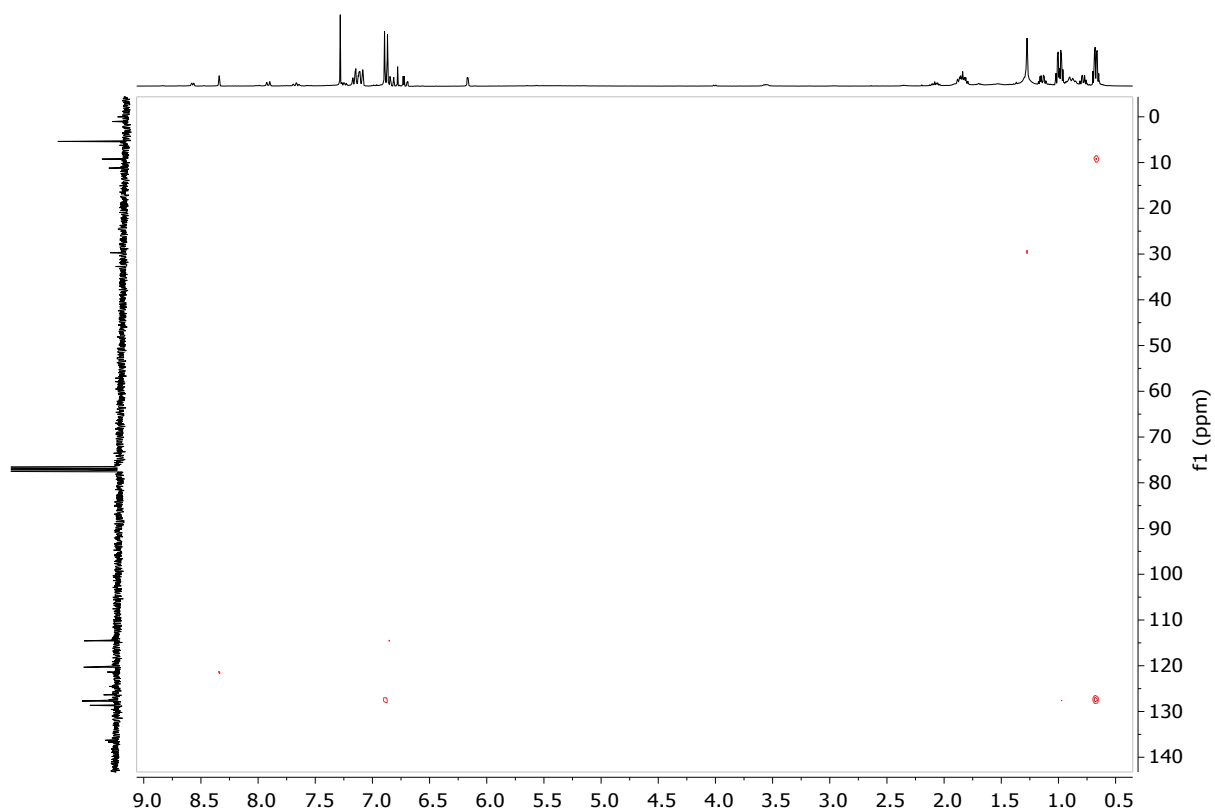

HMBC of *ortho*-phenol and *meta*-phenol with traces of *p*-benzoquinone (aromatic region)
